# Supplementary material for: Dehydration mechanism of fructose to 5-hydroxymethylfurfural catalyzed by functionalized ionic liquids: a density functional theory study
Source: Royal Society of Chemistry journal article supplement (doi:10.1039/d3nj01286g), 2023-01-01
Supplement: d3nj01286g1.pdf [file d3nj01286g1.pdf]

## **Supplementary Information**

# **Dehydration Mechanism of Fructose to 5-Hydroxymethylfurfural Catalyzed by Functionalized Ionic Liquids: A Density Functional Theory Study**

Jiehao Hu<sup>a</sup>, Mengting Yu<sup>a\*</sup>, Yao Li<sup>b</sup>, Xiaoli Shen<sup>a</sup>, Shenyu Cheng<sup>a</sup>, Tianyou Xu<sup>a</sup>, Chengsheng Ge<sup>a</sup>

Yihang Yu<sup>a</sup> and Zhaoyang Ju<sup>a\*</sup>

<sup>a</sup>College of Chemical & Material Engineering, Quzhou University, Quzhou, China.

<sup>b</sup>Beijing Key Laboratory of Ionic Liquids Clean Process, State Key Laboratory of Multiphase Complex Systems, Institute of Process Engineering, Chinese Academy of Sciences, Beijing, China.

# Contents

1. ESP mapped molecular vdW surface and area percent of anions and cations.
2. The different dehydration sequences of fructose to HMF.
3. The second and third dehydration catalyzed by  $\text{HSO}_4^-$  through different ways.
4. The energies of second dehydration catalyzed by different anions and cations.
5. The coordinates of reactants, TS and products in the dehydration of fructose to HMF.

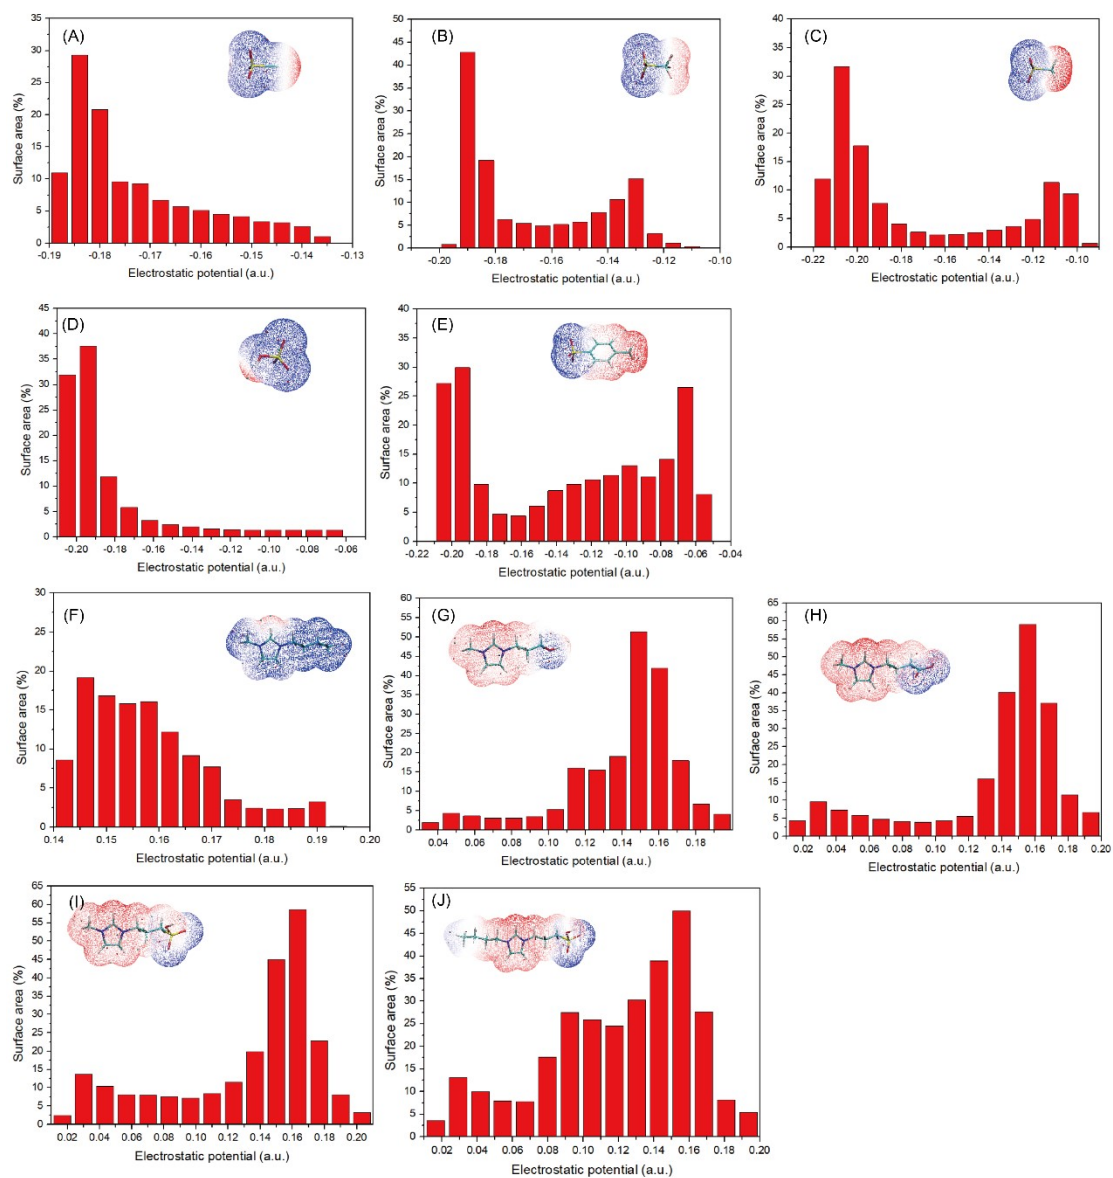

**Figure S1** ESP mapped molecular vdW surface and area percent of anions and cations (A)  $\text{ClSO}_3^-$  (B)  $\text{CF}_3\text{SO}_3^-$  (C)  $\text{CH}_3\text{SO}_3^-$  (D)  $\text{HSO}_4^-$  (E)  $p\text{-CH}_3\text{C}_6\text{H}_4\text{SO}_3^-$  (F)  $\text{Bmim}^+$  (G)  $\text{BmimOH}^+$  (H)  $\text{BmimCOOH}^+$  (I)  $\text{BmimHSO}_3^+$  (J)  $\text{BBimHSO}_3^+$ .

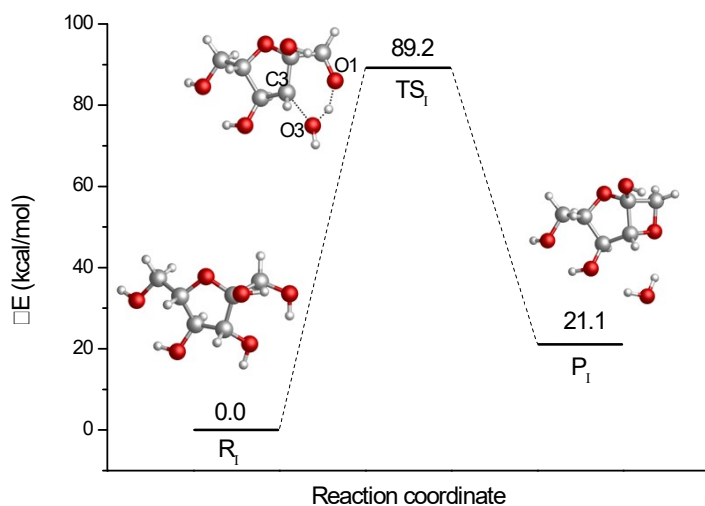

**Figure S2** Computed free energy profiles (energy kcal/mol) and optimized geometries of intermediate and TS for the first dehydration of fructose in route 2-1-3.

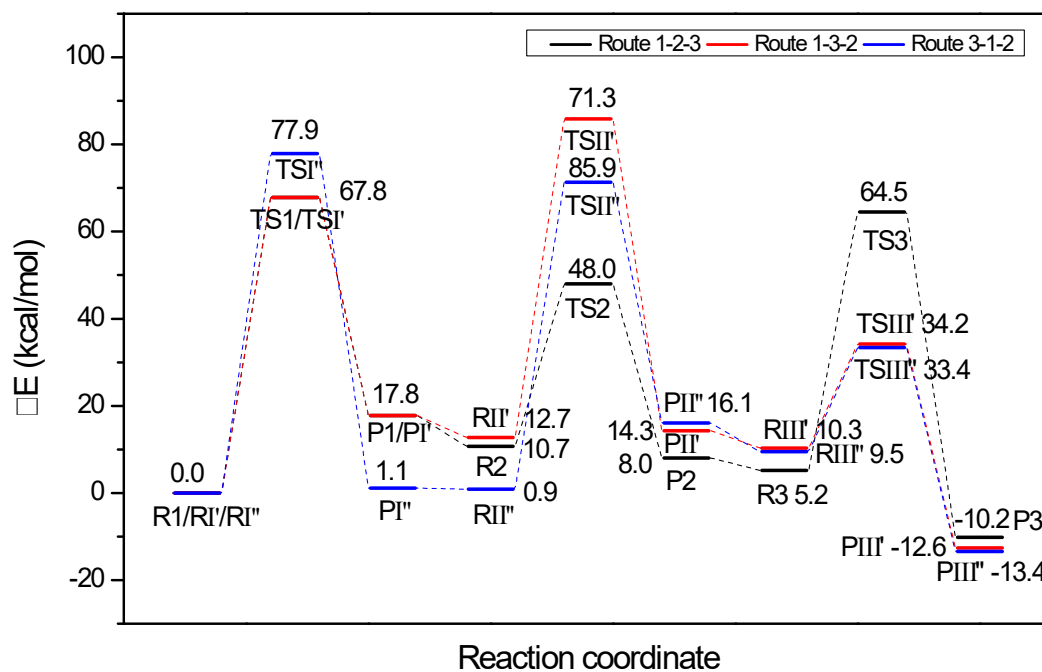

**Figure S3** Computed free energy profiles (energy kcal/mol) for the different dehydration sequences of fructose at M06-2X-D3/6-311+G\*\* level.

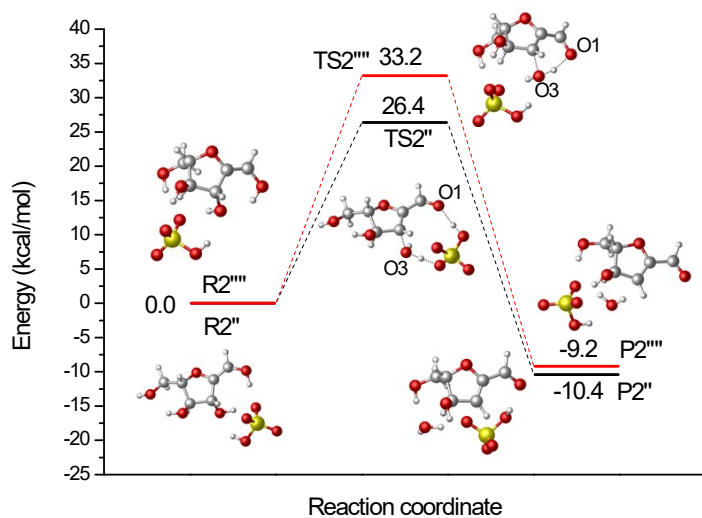

**Figure S4** Computed free energy profiles (energy kcal/mol) and optimized geometries of intermediate and TS for the second dehydration catalyzed by  $\text{HSO}_4^-$  through different ways.

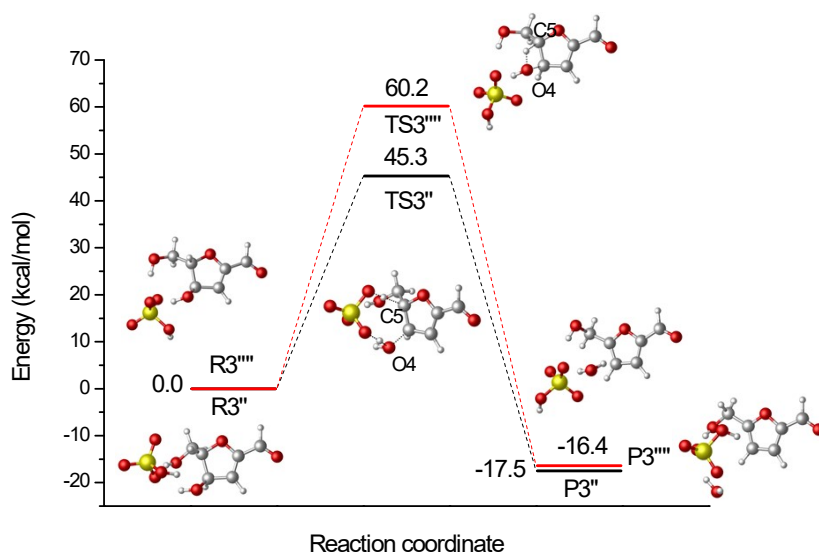

**Figure S5** Computed free energy profiles (energy kcal/mol) and optimized geometries of intermediate and TS for the third dehydration catalyzed by  $\text{HSO}_4^-$  through different ways.

**Table S1** Calculated activation energy (Ga) and reaction energy (Gr) for the second dehydration of fructose catalyzed by different anions and cations at the M06-2X-D3/6-311+G\*\* level.

| Anions                                                                               | Ga   | Gr   | Cations                           | Ga   | Gr   |
|--------------------------------------------------------------------------------------|------|------|-----------------------------------|------|------|
| ClSO <sub>3</sub> <sup>-</sup>                                                       | 38.3 | -6.3 | Bmim <sup>+</sup>                 | 37.3 | -8.5 |
| CF <sub>3</sub> SO <sub>3</sub> <sup>-</sup>                                         | 37.2 | -6.6 | BmimOH <sup>+</sup>               | 25.2 | 0.1  |
| CH <sub>3</sub> SO <sub>3</sub> <sup>-</sup>                                         | 33.5 | -9.5 | BmimCOOH <sup>+</sup>             | 21.7 | -8.2 |
| HSO <sub>4</sub> <sup>-</sup>                                                        | 33.2 | -9.2 | BmimHSO <sub>3</sub> <sup>+</sup> | 22.7 | -4.3 |
| <i>p</i> -CH <sub>3</sub> C <sub>6</sub> H <sub>4</sub> SO <sub>3</sub> <sup>-</sup> | 32.9 | -7.9 | BBimHSO <sub>3</sub> <sup>+</sup> | 23.7 | -3.7 |

**Table S2** The coordinates of reactants, TS and products in the dehydration of fructose to HMF.

| R1                                                                                 |             |             |             | TS1                                                                                 |             |             |             |
|------------------------------------------------------------------------------------|-------------|-------------|-------------|-------------------------------------------------------------------------------------|-------------|-------------|-------------|
| 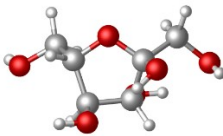 |             |             |             |  |             |             |             |
| O                                                                                  | 0.07031800  | -0.12042900 | 1.30227400  | O                                                                                   | 0.01892400  | -1.11369600 | -0.68258400 |
| C                                                                                  | -1.03301400 | 0.14449200  | 0.46087000  | C                                                                                   | -0.99715900 | -0.39734100 | -0.30841200 |
| C                                                                                  | 1.30351800  | 0.17028500  | 0.64721800  | C                                                                                   | 1.18763800  | -0.59733600 | -0.00890500 |
| H                                                                                  | 1.87712300  | 0.87429600  | 1.26049200  | H                                                                                   | 1.19257300  | -1.04659500 | 0.98950600  |
| C                                                                                  | -0.45235800 | 0.22577500  | -0.96938600 | C                                                                                   | -0.60426900 | 0.99425500  | 0.14124500  |
| H                                                                                  | -1.04481100 | 0.90195400  | -1.59042800 | H                                                                                   | -0.98049900 | 1.19863000  | 1.14290900  |
| C                                                                                  | 0.92865700  | 0.80762600  | -0.69408900 | C                                                                                   | 0.92311900  | 0.91039900  | 0.12004700  |
| H                                                                                  | 1.64572200  | 0.57416900  | -1.48357900 | H                                                                                   | 1.26933900  | 1.42318600  | -0.78709200 |
| O                                                                                  | -0.30691800 | -1.04094500 | -1.56728700 | O                                                                                   | -1.04896200 | 1.91784600  | -0.82816300 |
| H                                                                                  | -1.19565400 | -1.37537000 | -1.73771600 | H                                                                                   | -2.01444600 | 1.88085300  | -0.83262300 |
| O                                                                                  | 0.72631200  | 2.21273900  | -0.55780500 | O                                                                                   | 1.49315600  | 1.46367800  | 1.27285500  |
| H                                                                                  | 1.55736400  | 2.62428900  | -0.30612700 | H                                                                                   | 2.44594300  | 1.33335000  | 1.20750400  |
| O                                                                                  | -1.67472300 | 1.34399800  | 0.80273800  | O                                                                                   | -1.29347600 | -1.22288000 | 1.70912500  |
| H                                                                                  | -1.09510400 | 2.07709000  | 0.55518700  | H                                                                                   | -1.03331000 | -1.48056300 | 2.59872000  |
| C                                                                                  | -2.05531200 | -0.96041300 | 0.64167200  | C                                                                                   | -2.33479400 | -0.87075300 | -0.46395300 |
| H                                                                                  | -2.49409600 | -0.87315600 | 1.63984200  | H                                                                                   | -2.21472900 | -1.41609600 | 0.63476100  |
| H                                                                                  | -1.56399900 | -1.92764600 | 0.54941100  | H                                                                                   | -2.49592200 | -1.58424600 | -1.27010900 |
| O                                                                                  | -3.03640200 | -0.88831900 | -0.37911000 | O                                                                                   | -3.28241200 | 0.17691900  | -0.41931000 |
| H                                                                                  | -3.47864800 | -0.03704200 | -0.29483300 | H                                                                                   | -3.78171300 | 0.09006900  | 0.39676300  |
| C                                                                                  | 2.11139400  | -1.10739000 | 0.49754000  | C                                                                                   | 2.42316100  | -0.93659900 | -0.80882000 |
| H                                                                                  | 2.19232900  | -1.58372300 | 1.48023300  | H                                                                                   | 2.60782300  | -2.01474500 | -0.80341800 |
| H                                                                                  | 1.59884300  | -1.78453600 | -0.19273100 | H                                                                                   | 2.29139700  | -0.59619800 | -1.84253700 |
| O                                                                                  | 3.38233400  | -0.71404800 | 0.00205500  | O                                                                                   | 3.46589100  | -0.22233100 | -0.16025800 |

|                                                                                     |             |             |             |                                                                                      |             |             |             |
|-------------------------------------------------------------------------------------|-------------|-------------|-------------|--------------------------------------------------------------------------------------|-------------|-------------|-------------|
| H                                                                                   | 3.89625100  | -1.49653500 | -0.20562400 | H                                                                                    | 4.30239600  | -0.39968200 | -0.59491500 |
| P1                                                                                  |             |             |             | R2                                                                                   |             |             |             |
| 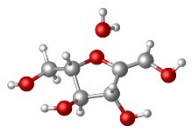   |             |             |             |    |             |             |             |
| O                                                                                   | 0.00747100  | -0.97072100 | -0.91850200 | O                                                                                    | -0.02168000 | -1.43216800 | 0.22903100  |
| C                                                                                   | -1.08234700 | -0.25925400 | -0.50075400 | C                                                                                    | -1.15976900 | -0.63902000 | 0.17247800  |
| C                                                                                   | 1.14768500  | -0.51937000 | -0.17868100 | C                                                                                    | 1.10742100  | -0.58877400 | 0.41901900  |
| H                                                                                   | 1.24893200  | -1.11609100 | 0.73380800  | H                                                                                    | 1.33623200  | -0.48806700 | 1.48846700  |
| C                                                                                   | -0.68301500 | 0.88519100  | 0.40967100  | C                                                                                    | -0.77952400 | 0.81091100  | 0.29823400  |
| H                                                                                   | -0.88599600 | 0.61610300  | 1.45439700  | H                                                                                    | -0.82504000 | 1.14296800  | 1.34539000  |
| C                                                                                   | 0.82598100  | 0.92809300  | 0.20516800  | C                                                                                    | 0.68041500  | 0.77730200  | -0.12421500 |
| H                                                                                   | 1.02652400  | 1.59142000  | -0.64869100 | H                                                                                    | 0.72148500  | 0.76430600  | -1.22312900 |
| O                                                                                   | -1.26713800 | 2.11773200  | 0.06526400  | O                                                                                    | -1.62075700 | 1.62085100  | -0.50369400 |
| H                                                                                   | -2.22113900 | 1.98723900  | 0.03057500  | H                                                                                    | -1.37997500 | 2.54134400  | -0.36206600 |
| O                                                                                   | 1.49390400  | 1.35947400  | 1.35916400  | O                                                                                    | 1.38175000  | 1.86926900  | 0.40779600  |
| H                                                                                   | 2.43751800  | 1.26798700  | 1.18646300  | H                                                                                    | 2.31690500  | 1.72637800  | 0.22032400  |
| O                                                                                   | -0.73526500 | -2.08796300 | 1.80448800  | C                                                                                    | -2.37175100 | -1.14862200 | -0.01310700 |
| H                                                                                   | -0.87954900 | -2.88322100 | 2.32096100  | H                                                                                    | -2.53079000 | -2.21604700 | -0.09428500 |
| C                                                                                   | -2.31620200 | -0.56583800 | -0.88874100 | O                                                                                    | -3.51334000 | -0.41139200 | -0.11032800 |
| H                                                                                   | -1.26738300 | -2.18641200 | 1.00863100  | H                                                                                    | -3.26881900 | 0.50927400  | -0.27534100 |
| H                                                                                   | -2.53795900 | -1.36475900 | -1.58763200 | C                                                                                    | 2.29333100  | -1.17223700 | -0.31768900 |
| O                                                                                   | -3.35526000 | 0.26959700  | -0.50437500 | H                                                                                    | 2.61745800  | -2.10693600 | 0.14955400  |
| H                                                                                   | -4.07807300 | -0.25210900 | -0.14826000 | H                                                                                    | 1.99983200  | -1.37170400 | -1.35434600 |
| C                                                                                   | 2.37210600  | -0.64594200 | -1.05725500 | O                                                                                    | 3.30950700  | -0.17663500 | -0.25143700 |
| H                                                                                   | 2.59353900  | -1.69808100 | -1.26234900 | H                                                                                    | 4.10812300  | -0.49827100 | -0.67383500 |
| H                                                                                   | 2.18508000  | -0.12701200 | -2.00444400 |                                                                                      |             |             |             |
| O                                                                                   | 3.42568300  | -0.02636100 | -0.32892500 |                                                                                      |             |             |             |
| H                                                                                   | 4.23811000  | -0.06641000 | -0.83683200 |                                                                                      |             |             |             |
| TS2                                                                                 |             |             |             | P2                                                                                   |             |             |             |
|  |             |             |             |  |             |             |             |
| O                                                                                   | 0.05075500  | -1.47921600 | 0.03960000  | O                                                                                    | -0.41343000 | -1.42637400 | -0.18970300 |
| C                                                                                   | -1.08655000 | -0.71208700 | 0.31522100  | C                                                                                    | 0.76847000  | -0.72808300 | -0.12520700 |
| C                                                                                   | 1.14632500  | -0.63062500 | 0.34335100  | C                                                                                    | -1.44518700 | -0.44181700 | -0.33551900 |
| H                                                                                   | 1.37805800  | -0.67690900 | 1.41685500  | H                                                                                    | -1.72187000 | -0.38125200 | -1.39452300 |
| C                                                                                   | -0.80166900 | 0.66895200  | 0.35986300  | C                                                                                    | 0.64517200  | 0.59539000  | -0.01592500 |
| H                                                                                   | -1.24546700 | 1.32216100  | 1.10385400  | H                                                                                    | 1.45296400  | 1.31065200  | 0.07011800  |
| C                                                                                   | 0.66067500  | 0.79968400  | 0.02499300  | C                                                                                    | -0.82238000 | 0.91191900  | 0.06914500  |
| H                                                                                   | 0.74194900  | 0.98119700  | -1.05696800 | H                                                                                    | -1.08395600 | 1.16642100  | 1.10750200  |

|                                                                                     |             |             |             |                                                                                      |             |             |             |
|-------------------------------------------------------------------------------------|-------------|-------------|-------------|--------------------------------------------------------------------------------------|-------------|-------------|-------------|
| O                                                                                   | -1.82361600 | 1.36144300  | -0.99099200 | O                                                                                    | 3.60684300  | 1.63146600  | 0.52942400  |
| H                                                                                   | -2.02434800 | 2.29073600  | -0.82824100 | H                                                                                    | 4.45509000  | 2.00336200  | 0.28367600  |
| O                                                                                   | 1.29091900  | 1.80393400  | 0.77059400  | O                                                                                    | -1.20453400 | 1.96025800  | -0.78772700 |
| H                                                                                   | 2.23700000  | 1.72330900  | 0.59966100  | H                                                                                    | -2.14654300 | 2.10635300  | -0.64714300 |
| C                                                                                   | -2.39713400 | -1.13701800 | 0.21254000  | C                                                                                    | 1.98318200  | -1.56148100 | -0.19099200 |
| H                                                                                   | -2.64943800 | -2.20156800 | 0.20217000  | H                                                                                    | 1.79800700  | -2.63606500 | -0.36085400 |
| O                                                                                   | -3.31755100 | -0.26795600 | 0.06054600  | O                                                                                    | 3.10472000  | -1.13047800 | -0.07609600 |
| H                                                                                   | -2.64779400 | 0.75997200  | -0.60435300 | H                                                                                    | 3.65987900  | 0.68717600  | 0.32988200  |
| C                                                                                   | 2.34909800  | -1.02971200 | -0.48061300 | C                                                                                    | -2.64627100 | -0.81484300 | 0.50181800  |
| H                                                                                   | 2.72741000  | -2.00531700 | -0.16206900 | H                                                                                    | -3.09290700 | -1.74868900 | 0.14706400  |
| H                                                                                   | 2.05642700  | -1.08242900 | -1.53495000 | H                                                                                    | -2.33450800 | -0.93972200 | 1.54552200  |
| O                                                                                   | 3.30961300  | -0.00084300 | -0.26188700 | O                                                                                    | -3.53701900 | 0.28276200  | 0.35406100  |
| H                                                                                   | 4.12078000  | -0.20520800 | -0.73097900 | H                                                                                    | -4.33671400 | 0.12418400  | 0.85917300  |
| R3                                                                                  |             |             |             | TS3                                                                                  |             |             |             |
| 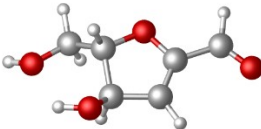   |             |             |             |    |             |             |             |
| O                                                                                   | 0.41293500  | -1.11657600 | -0.31766100 | O                                                                                    | 0.35311400  | -0.92832600 | -0.53176900 |
| C                                                                                   | 1.35183100  | -0.16300700 | -0.01866400 | C                                                                                    | 1.32138100  | -0.18161300 | 0.00802300  |
| C                                                                                   | -0.83981700 | -0.42357900 | -0.40156700 | C                                                                                    | -0.87401800 | -0.29388500 | -0.22300500 |
| H                                                                                   | -1.06175600 | -0.23456700 | -1.45819000 | H                                                                                    | -1.19238400 | 0.77727000  | -1.06191300 |
| C                                                                                   | 0.86265900  | 1.03487100  | 0.29715800  | C                                                                                    | 0.87120000  | 0.87922000  | 0.72541000  |
| H                                                                                   | 1.44584500  | 1.89988700  | 0.57289500  | H                                                                                    | 1.48889400  | 1.58225000  | 1.25910700  |
| C                                                                                   | -0.63749200 | 0.94316100  | 0.28907300  | C                                                                                    | -0.56401200 | 0.86236300  | 0.61268300  |
| H                                                                                   | -1.02004000 | 0.91781500  | 1.32067300  | H                                                                                    | -1.23829100 | 1.26808400  | 1.35604600  |
| O                                                                                   | -1.24543900 | 1.99993900  | -0.41440400 | O                                                                                    | -1.03411100 | 1.98864300  | -0.76118400 |
| H                                                                                   | -2.19709600 | 1.85543000  | -0.36639900 | H                                                                                    | -1.83710500 | 2.51703200  | -0.63957000 |
| C                                                                                   | 2.76239500  | -0.61018600 | -0.09022700 | C                                                                                    | 2.70909800  | -0.62642400 | -0.25541700 |
| H                                                                                   | 2.90187100  | -1.65100300 | -0.43441600 | H                                                                                    | 2.79509700  | -1.51295800 | -0.90847800 |
| O                                                                                   | 3.68902900  | 0.09809900  | 0.19764400  | O                                                                                    | 3.66711300  | -0.07341500 | 0.21206200  |
| C                                                                                   | -1.93816100 | -1.24839800 | 0.22703400  | C                                                                                    | -1.97258500 | -1.26744000 | 0.09515600  |
| H                                                                                   | -2.08862000 | -2.18165600 | -0.32401200 | H                                                                                    | -2.06616000 | -1.98301900 | -0.72863400 |
| H                                                                                   | -1.66748000 | -1.48367200 | 1.26310200  | H                                                                                    | -1.75275700 | -1.82674600 | 1.01531200  |
| O                                                                                   | -3.08634900 | -0.41257900 | 0.16813800  | O                                                                                    | -3.14685400 | -0.48739900 | 0.25192100  |
| H                                                                                   | -3.84262100 | -0.87047200 | 0.53977400  | H                                                                                    | -3.85776900 | -1.05126400 | 0.56278000  |
| P3                                                                                  |             |             |             | R1''                                                                                 |             |             |             |
|  |             |             |             |  |             |             |             |
| O                                                                                   | 0.48083900  | -0.46091700 | -0.80532700 | O                                                                                    | 1.39554600  | -0.58655100 | -0.97663900 |
| C                                                                                   | 1.53058600  | -0.10885700 | -0.00553000 | C                                                                                    | 0.56044600  | 0.30169400  | -0.26311500 |
| C                                                                                   | -0.59785400 | -0.57313700 | -0.01402800 | C                                                                                    | 2.48923400  | -0.86416000 | -0.12584700 |



|   |             |             |             |   |             |             |             |
|---|-------------|-------------|-------------|---|-------------|-------------|-------------|
| H | -2.68383600 | 1.33987400  | 0.16782100  | H | 2.19104400  | -1.53915300 | 0.68680300  |
| C | 1.11169600  | 0.00314400  | 1.28640200  | C | 1.52835600  | 1.24010800  | 0.52520300  |
| H | 1.73874600  | 0.27088400  | 2.12176800  | H | 1.18805900  | 1.31547100  | 1.56230800  |
| C | -0.28030900 | -0.30190300 | 1.28361500  | C | 2.86445300  | 0.49809800  | 0.47003900  |
| H | -0.96463800 | -0.32455400 | 2.11547700  | H | 3.50455100  | 1.04045200  | -0.23936600 |
| O | -2.39188200 | 2.10586500  | -0.34090600 | O | 1.68268700  | 2.51477100  | -0.06033600 |
| H | -1.59714600 | 2.41013200  | 0.10247400  | H | 0.79061000  | 2.88250300  | -0.14088900 |
| C | 2.82740500  | 0.07128800  | -0.65175600 | O | 3.48521000  | 0.40202000  | 1.73335900  |
| H | 2.82790100  | -0.10201600 | -1.74367500 | H | 4.24337200  | -0.18061500 | 1.61643300  |
| O | 3.82559700  | 0.38427700  | -0.05303500 | O | -0.17316300 | -0.48055600 | 0.65122800  |
| C | -1.88100500 | -0.94214900 | -0.67497100 | H | -0.94125900 | 0.03596800  | 0.97423100  |
| H | -1.99623300 | -0.34018300 | -1.58279800 | C | -0.33205300 | 1.03217500  | -1.25955600 |
| H | -1.86841500 | -2.00356900 | -0.94785500 | H | -1.06240700 | 0.33316400  | -1.67807500 |
| O | -2.91176200 | -0.66939500 | 0.26117300  | H | 0.30008500  | 1.42458200  | -2.05768100 |
| H | -3.74183500 | -1.01953600 | -0.07084800 | O | -0.97319600 | 2.12967200  | -0.63403500 |
|   |             |             |             | H | -1.75110400 | 1.78210100  | -0.15569100 |
|   |             |             |             | C | 3.59790700  | -1.48446900 | -0.94364500 |
|   |             |             |             | H | 3.29881800  | -2.47073000 | -1.31217600 |
|   |             |             |             | H | 3.81486900  | -0.83112100 | -1.79651000 |
|   |             |             |             | O | 4.72552700  | -1.58108000 | -0.07282100 |
|   |             |             |             | H | 5.47722500  | -1.91550600 | -0.56397500 |
|   |             |             |             | S | -3.49100700 | -0.42611800 | 0.12535900  |
|   |             |             |             | O | -2.65595700 | 0.58593000  | 0.84931100  |
|   |             |             |             | O | -4.81135900 | -0.61580600 | 0.68475700  |
|   |             |             |             | O | -3.40437800 | -0.23826400 | -1.32139700 |
|   |             |             |             | O | -2.72909000 | -1.83948300 | 0.44877400  |
|   |             |             |             | H | -1.78242300 | -1.72512300 | 0.26277300  |

TS1''

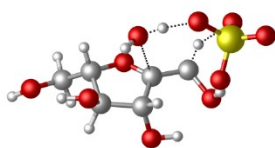

|   |            |             |             |
|---|------------|-------------|-------------|
| O | 1.59284300 | 0.53567500  | -1.25798900 |
| C | 0.62397900 | 0.82625900  | -0.46994900 |
| C | 2.53704500 | -0.34832600 | -0.59984600 |
| H | 2.32102600 | -1.35282800 | -0.96420800 |
| C | 0.91870300 | 0.53490100  | 0.97784300  |
| H | 0.09092400 | 0.00247400  | 1.45148500  |
| C | 2.22987100 | -0.25218100 | 0.90804500  |
| H | 2.99980800 | 0.34392700  | 1.40897300  |
| O | 1.17513600 | 1.80500200  | 1.54952700  |
| H | 0.34268500 | 2.30277800  | 1.41945300  |
| O | 2.11759000 | -1.51879200 | 1.51416800  |

PI''

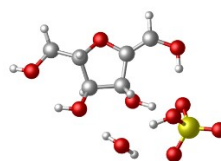

|   |             |             |             |
|---|-------------|-------------|-------------|
| O | 2.60058600  | 1.56393500  | -0.16860900 |
| C | 1.20100400  | 1.58612400  | -0.04242300 |
| C | 2.93989100  | 0.21883000  | -0.43350400 |
| H | 2.75782400  | -0.02937100 | -1.49007300 |
| C | 0.69963200  | 0.23591500  | 0.43047300  |
| H | -0.00351700 | -0.17684600 | -0.30208100 |
| C | 1.98154700  | -0.59699800 | 0.43382900  |
| H | 2.34973500  | -0.62322700 | 1.46763900  |
| O | 0.13300100  | 0.21477000  | 1.71851500  |
| H | -0.81811600 | 0.39245700  | 1.60180800  |
| O | 1.76101500  | -1.90734900 | -0.05023600 |

|   |             |             |             |   |             |             |             |
|---|-------------|-------------|-------------|---|-------------|-------------|-------------|
| H | 2.98409400  | -1.93508500 | 1.48017000  | H | 2.61872200  | -2.34271000 | -0.10311000 |
| O | 0.04105400  | -1.59319600 | -0.53000000 | O | -0.95595400 | -2.67698400 | -0.57084100 |
| H | 0.33890200  | -2.08304300 | 0.24378500  | H | -0.04719900 | -2.51781600 | -0.28039900 |
| C | -0.50526100 | 1.64153500  | -0.90134600 | C | 0.53309200  | 2.68747000  | -0.37866000 |
| H | -1.25746200 | 0.92479400  | -1.36061300 | H | -1.86315500 | -1.29169400 | -1.33237600 |
| H | -0.18992300 | 2.32329000  | -1.69912000 | H | 1.09185500  | 3.54901100  | -0.73041700 |
| O | -1.09064900 | 2.29964600  | 0.17883800  | O | -0.79163200 | 2.91050000  | -0.31889100 |
| H | -1.74786900 | 1.56368400  | 0.57444700  | H | -1.31346600 | 2.12706200  | -0.03218000 |
| C | 3.93256500  | 0.10093500  | -0.96697400 | C | 4.39380400  | 0.00030200  | -0.08055600 |
| H | 4.08031200  | 0.04793300  | -2.05028200 | H | 5.04705000  | 0.56349900  | -0.75489400 |
| H | 4.08480000  | 1.13362300  | -0.63073400 | H | 4.55526800  | 0.34381600  | 0.94723500  |
| O | 4.78781300  | -0.79970400 | -0.27758400 | O | 4.62656800  | -1.40384700 | -0.19574600 |
| H | 5.69916500  | -0.52688100 | -0.39573000 | H | 5.50943500  | -1.60578600 | 0.11743400  |
| S | -3.08800100 | -0.46410600 | -0.05032500 | S | -3.13211200 | -0.20349800 | 0.02000300  |
| O | -2.26919900 | 0.32564600  | 0.99091900  | O | -2.23118100 | 0.83493500  | 0.60275200  |
| O | -4.48379300 | -0.58378600 | 0.36380300  | O | -4.46206200 | 0.28691800  | -0.26732300 |
| O | -2.91617300 | 0.26649300  | -1.35137900 | O | -2.48360400 | -0.53812700 | -1.43235400 |
| O | -2.42568000 | -1.81792000 | -0.16681400 | O | -3.03807400 | -1.45789700 | 0.78256300  |
| H | -0.99138600 | -1.69023100 | -0.46696800 | H | -1.53377800 | -2.53709900 | 0.19776300  |

R1''''

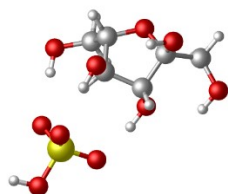

|   |             |             |             |
|---|-------------|-------------|-------------|
| O | 2.49108700  | 1.13398800  | -0.02855600 |
| C | 2.49192300  | -0.25418700 | 0.25834300  |
| C | 1.20858800  | 1.70148000  | 0.25950800  |
| H | 1.29071400  | 2.42890200  | 1.07223000  |
| C | 1.02376700  | -0.68598000 | 0.11524500  |
| H | 0.81115800  | -1.57233300 | 0.71985300  |
| C | 0.30612100  | 0.54635600  | 0.67961700  |
| H | -0.67125300 | 0.68428500  | 0.23648500  |
| O | 0.73950000  | -0.91575900 | -1.25026900 |
| H | -0.20651900 | -1.14545900 | -1.30302300 |
| O | 0.19112700  | 0.45558000  | 2.09012200  |
| H | -0.67347900 | 0.04287100  | 2.24583500  |
| O | 2.93861900  | -0.49729000 | 1.56689400  |
| H | 2.22663800  | -0.25233100 | 2.17418400  |
| C | 3.44030100  | -0.93136900 | -0.72347900 |
| H | 4.46000900  | -0.81419400 | -0.35353600 |
| H | 3.33971800  | -0.42149100 | -1.68516200 |
| O | 3.18753300  | -2.31520100 | -0.84990700 |
| H | 2.30922700  | -2.38168500 | -1.24405700 |

TS1''''

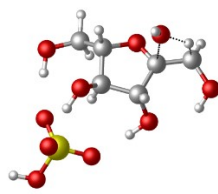

|   |             |             |             |
|---|-------------|-------------|-------------|
| O | 2.16288100  | 0.99118000  | -0.84358400 |
| C | 2.44125300  | -0.17506100 | -0.35872400 |
| C | 1.09344600  | 1.60032700  | -0.06627000 |
| H | 1.57525600  | 2.18445800  | 0.72137900  |
| C | 1.31387500  | -0.76657500 | 0.44713300  |
| H | 1.66370400  | -1.08281600 | 1.42836100  |
| C | 0.33766500  | 0.41794200  | 0.55090200  |
| H | -0.49544400 | 0.20326800  | -0.11846800 |
| O | 0.83546300  | -1.86428700 | -0.31970800 |
| H | -0.13541000 | -1.83495600 | -0.40260100 |
| O | -0.09848100 | 0.70508400  | 1.84592200  |
| H | -1.00656100 | 0.37121600  | 1.93157000  |
| O | 3.66314200  | 0.57283400  | 1.35802400  |
| H | 3.76406800  | 0.73127000  | 2.30029700  |
| C | 3.64675800  | -0.85383100 | -0.69511300 |
| H | 4.13828900  | -0.30057300 | 0.29465100  |
| H | 4.11820800  | -0.51368600 | -1.61803100 |
| O | 3.63564400  | -2.24752500 | -0.51593700 |
| H | 2.74938300  | -2.57514400 | -0.71322700 |

|   |             |             |             |   |             |             |             |
|---|-------------|-------------|-------------|---|-------------|-------------|-------------|
| C | 0.67341500  | 2.37772300  | -1.00454800 | C | 0.24897400  | 2.42112600  | -1.03626700 |
| H | 1.37608800  | 3.15356500  | -1.31710600 | H | 0.82699200  | 3.27724100  | -1.39354500 |
| H | 0.61426200  | 1.62572200  | -1.79936700 | H | 0.01305600  | 1.78293300  | -1.89835500 |
| O | -0.57169800 | 3.00634500  | -0.77852500 | O | -0.91677600 | 2.90804800  | -0.42551500 |
| H | -1.27717400 | 2.34266100  | -0.75824700 | H | -1.59466100 | 2.21223300  | -0.44701000 |
| S | -2.73880600 | -0.52394100 | -0.02857600 | S | -2.82425100 | -0.56392000 | -0.03195800 |
| O | -2.44263500 | -0.55183600 | 1.41074900  | O | -2.66118700 | -0.39454900 | 1.41791700  |
| O | -2.77312800 | 0.83611900  | -0.58489700 | O | -2.75314200 | 0.71323300  | -0.75896800 |
| O | -1.96812600 | -1.48133100 | -0.82351100 | O | -2.01552300 | -1.63652600 | -0.60923200 |
| O | -4.26776700 | -1.09009600 | -0.17013700 | O | -4.34966100 | -1.10417000 | -0.24405200 |
| H | -4.83928100 | -0.47574000 | 0.30529300  | H | -4.93956900 | -0.44287000 | 0.13740400  |

P1''''

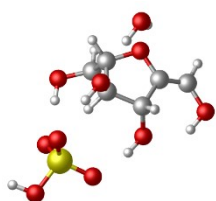

|   |             |             |             |
|---|-------------|-------------|-------------|
| O | 2.67534500  | -0.73774000 | 0.40905200  |
| C | 2.47358600  | 0.57968300  | 0.04448700  |
| C | 1.37279000  | -1.29559000 | 0.67894100  |
| H | 1.42241900  | -2.36878400 | 0.49330400  |
| C | 1.10512700  | 0.75928400  | -0.56560800 |
| H | 1.16727800  | 0.88884000  | -1.65321100 |
| C | 0.41574900  | -0.59601300 | -0.28355200 |
| H | -0.52204500 | -0.42448700 | 0.23221600  |
| O | 0.49400800  | 1.88645900  | 0.03919400  |
| H | -0.45434800 | 1.90435000  | -0.18981600 |
| O | 0.18752400  | -1.34603100 | -1.45701500 |
| H | -0.76384700 | -1.27904300 | -1.64654900 |
| O | 2.84248400  | -2.27331200 | -2.11404100 |
| H | 1.89204000  | -2.09316900 | -2.12653100 |
| C | 3.34574500  | 1.55059600  | 0.28796300  |
| H | 3.14206800  | -1.80811200 | -1.32465500 |
| H | 4.30047400  | 1.37253800  | 0.76554200  |
| O | 3.11795600  | 2.85551800  | -0.05367300 |
| H | 2.15664900  | 2.96885000  | -0.11828600 |
| C | 0.96845200  | -1.00444400 | 2.12617000  |
| H | 1.73093000  | -1.40912800 | 2.79503600  |
| H | 0.92882100  | 0.08356700  | 2.27087600  |
| O | -0.25445200 | -1.62247700 | 2.45659300  |
| H | -0.99994900 | -1.13168800 | 2.07650800  |
| S | -2.82481800 | 0.26519300  | -0.19084400 |
| O | -2.54908600 | -0.73620000 | -1.23182700 |

TS1'

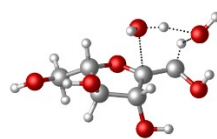

|   |             |             |             |
|---|-------------|-------------|-------------|
| O | -0.31855600 | 0.31528900  | 1.32339800  |
| C | 0.67520500  | 0.48880000  | 0.53656600  |
| C | -1.45603200 | -0.22053300 | 0.58556300  |
| H | -1.43147400 | -1.29933800 | 0.74323000  |
| C | 0.29840000  | 0.50080900  | -0.92354100 |
| H | 0.90685300  | -0.19323100 | -1.50230400 |
| C | -1.17543100 | 0.09339000  | -0.89624500 |
| H | -1.76687600 | 0.95852000  | -1.21509200 |
| O | 0.42547600  | 1.83941600  | -1.35008800 |
| H | 1.37104800  | 2.04961900  | -1.30982900 |
| O | -1.40976600 | -1.01304100 | -1.72861300 |
| H | -2.35815900 | -1.18054900 | -1.73217900 |
| O | 0.75278700  | -2.04111900 | 0.16882700  |
| H | 0.45031000  | -2.47736100 | -0.63177500 |
| C | 2.00593100  | 0.73971700  | 1.00435000  |
| H | 2.40034100  | -0.36240700 | 1.12168700  |
| H | 2.06804100  | 1.27489400  | 1.95279900  |
| O | 2.83482500  | 1.22884600  | -0.01594100 |
| H | 3.32865000  | 0.41147100  | -0.27305600 |
| C | -2.72605800 | 0.40632800  | 1.11173600  |
| H | -2.88380300 | 0.14082000  | 2.16133700  |
| H | -2.66741000 | 1.49746500  | 1.01887800  |
| O | -3.73307600 | -0.13403700 | 0.27223200  |
| H | -4.59099700 | 0.21224200  | 0.52610100  |
| O | 3.16838200  | -1.34782400 | 0.10459300  |
| H | 3.90798100  | -1.91186400 | 0.33516300  |

|                                                                                     |             |             |             |                                                                                      |             |             |             |
|-------------------------------------------------------------------------------------|-------------|-------------|-------------|--------------------------------------------------------------------------------------|-------------|-------------|-------------|
| O                                                                                   | -2.59749600 | -0.24504800 | 1.16851700  | H                                                                                    | 1.77283600  | -1.95159200 | 0.09921000  |
| O                                                                                   | -2.23864500 | 1.57902400  | -0.45494200 |                                                                                      |             |             |             |
| O                                                                                   | -4.42916900 | 0.56002000  | -0.28271800 |                                                                                      |             |             |             |
| H                                                                                   | -4.87984900 | -0.26962400 | -0.08447200 |                                                                                      |             |             |             |
| TS2'                                                                                |             |             |             | TS3'                                                                                 |             |             |             |
| 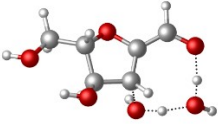   |             |             |             |    |             |             |             |
| O                                                                                   | 0.51809500  | 1.41827100  | 0.46857200  | O                                                                                    | -0.59634400 | -0.90064200 | 0.64757700  |
| C                                                                                   | -0.69158800 | 0.85571900  | 0.01021000  | C                                                                                    | -1.57127900 | -0.22296300 | 0.04324500  |
| C                                                                                   | 1.52202300  | 0.64088000  | -0.15906800 | C                                                                                    | 0.63716200  | -0.47202000 | 0.06075400  |
| H                                                                                   | 1.64298700  | 0.95039500  | -1.20666300 | H                                                                                    | 1.46582600  | 0.28305700  | 1.00206000  |
| C                                                                                   | -0.53231300 | -0.53276000 | -0.22929200 | C                                                                                    | -1.14725800 | 0.61201200  | -0.93563700 |
| H                                                                                   | -1.08936700 | -1.01881500 | -1.02370400 | H                                                                                    | -1.78477900 | 1.19441500  | -1.58213200 |
| C                                                                                   | 0.96492600  | -0.79578400 | -0.15233300 | C                                                                                    | 0.30721400  | 0.53450700  | -0.94035700 |
| H                                                                                   | 1.19962100  | -1.27350000 | 0.80971900  | H                                                                                    | 0.87729400  | 0.58319900  | -1.86178400 |
| O                                                                                   | -1.21799900 | -1.50944300 | 1.04492300  | O                                                                                    | 0.91325100  | 2.11438400  | -0.41064900 |
| H                                                                                   | -1.08696600 | -0.99271300 | 1.85071700  | H                                                                                    | 0.15059200  | 2.61490500  | -0.09792400 |
| O                                                                                   | 1.39822000  | -1.58540900 | -1.22444900 | C                                                                                    | -2.94813500 | -0.48959300 | 0.52339100  |
| H                                                                                   | 2.36211600  | -1.59545900 | -1.18859800 | H                                                                                    | -3.01603100 | -1.20358100 | 1.36325000  |
| O                                                                                   | -3.42918700 | -1.06358400 | 0.14601800  | O                                                                                    | -3.91749700 | 0.02226000  | 0.03228900  |
| H                                                                                   | -4.29340000 | -1.13671800 | 0.55431200  | C                                                                                    | 1.51542800  | -1.63887400 | -0.31330300 |
| C                                                                                   | -1.78475100 | 1.65018400  | -0.29074100 | H                                                                                    | 1.40383000  | -2.41141900 | 0.45398800  |
| H                                                                                   | -1.61656200 | 2.73428200  | -0.24160700 | H                                                                                    | 1.25020600  | -2.07586300 | -1.28678300 |
| O                                                                                   | -2.93669500 | 1.23485900  | -0.60086400 | O                                                                                    | 2.85138600  | -1.14044600 | -0.35790200 |
| H                                                                                   | -3.28622800 | -0.08498100 | -0.22540200 | H                                                                                    | 3.41485000  | -1.79220000 | -0.78047900 |
| C                                                                                   | 2.82977200  | 0.76266100  | 0.58855600  | O                                                                                    | 2.10654200  | 1.16987900  | 1.39607200  |
| H                                                                                   | 3.24542900  | 1.76837000  | 0.47981500  | H                                                                                    | 1.60436800  | 1.82408100  | 0.50758800  |
| H                                                                                   | 2.65578400  | 0.55950900  | 1.65132500  | H                                                                                    | 3.01634800  | 0.92151600  | 1.19454500  |
| O                                                                                   | 3.68210400  | -0.22017800 | 0.00903300  |                                                                                      |             |             |             |
| H                                                                                   | 4.55170100  | -0.17751600 | 0.41115400  |                                                                                      |             |             |             |
| H                                                                                   | -2.24983900 | -1.41438300 | 0.77907200  |                                                                                      |             |             |             |
| TS2''                                                                               |             |             |             | TS3''                                                                                |             |             |             |
|  |             |             |             |  |             |             |             |
| O                                                                                   | 2.36840800  | 1.46690600  | 0.27255500  | O                                                                                    | -1.73510600 | 0.34654600  | -1.04293800 |
| C                                                                                   | 0.98828000  | 1.30209000  | -0.02940400 | C                                                                                    | -2.57255900 | -0.22373900 | -0.17419700 |
| C                                                                                   | 2.97931900  | 0.31589500  | -0.27099500 | C                                                                                    | -0.65894600 | 0.90545800  | -0.27041700 |

|   |             |             |             |   |             |             |             |
|---|-------------|-------------|-------------|---|-------------|-------------|-------------|
| H | 3.14267000  | 0.44457700  | -1.35171600 | H | 0.55199100  | 0.10221100  | -0.93887000 |
| C | 0.64057400  | -0.05841400 | -0.07421900 | C | -2.22865500 | -0.05537500 | 1.12310100  |
| H | -0.19265900 | -0.41508300 | -0.67463600 | H | -2.80240300 | -0.39141300 | 1.97192100  |
| C | 1.95800800  | -0.82283700 | -0.08619800 | C | -0.97293500 | 0.70223500  | 1.13841700  |
| H | 2.09743900  | -1.30268600 | 0.89064000  | H | -0.88194400 | 1.55465900  | 1.81424800  |
| O | -0.06969300 | -0.57136500 | 1.50337100  | O | 0.16621400  | -0.21973500 | 1.96167000  |
| H | 0.02759000  | 0.23507800  | 2.02357300  | H | 0.90825200  | 0.39208100  | 2.10222000  |
| O | 2.00730600  | -1.77713200 | -1.11978000 | C | -3.71774300 | -0.93268300 | -0.76697900 |
| H | 2.90386900  | -2.12830600 | -1.11812400 | H | -3.69609100 | -0.97701000 | -1.87188700 |
| C | 0.19003900  | 2.42099700  | -0.26784500 | O | -4.62071400 | -1.41854800 | -0.13073300 |
| H | 0.74547300  | 3.37686200  | -0.30577500 | C | -0.28586200 | 2.30484200  | -0.71089900 |
| O | -1.04467600 | 2.43487700  | -0.42496600 | H | -0.05683700 | 2.30231300  | -1.78485200 |
| H | -2.43171000 | 1.48561900  | -0.31332300 | H | -1.09593700 | 3.02989600  | -0.54515900 |
| C | 4.28924200  | 0.05050300  | 0.43351200  | O | 0.80837300  | 2.76592900  | 0.05698800  |
| H | 4.99939700  | 0.86452800  | 0.25422700  | H | 1.49783400  | 2.07913300  | 0.07162700  |
| H | 4.10044600  | -0.02999400 | 1.51001700  | S | 2.36959500  | -0.73749700 | -0.21042700 |
| O | 4.77743000  | -1.18203100 | -0.09607500 | O | 3.54758700  | -1.37062200 | -0.75100300 |
| H | 5.54268600  | -1.46338800 | 0.40763300  | O | 2.57270100  | 0.51142200  | 0.56006200  |
| S | -3.14074400 | -0.54245500 | -0.06414100 | O | 1.41391000  | -0.35901700 | -1.40181100 |
| O | -4.48865900 | -1.06558600 | -0.06854700 | O | 1.54295400  | -1.69196700 | 0.64606000  |
| O | -2.23819600 | -0.97801100 | -1.12933500 | H | 0.71447400  | -1.00840800 | 1.32708100  |
| O | -3.31219000 | 1.04050900  | -0.20911800 |   |             |             |             |
| O | -2.47373400 | -0.73714900 | 1.28463400  |   |             |             |             |
| H | -1.16402700 | -0.68547000 | 1.37272300  |   |             |             |             |

TS1''''

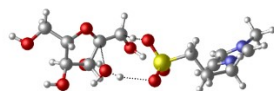

|   |             |             |             |
|---|-------------|-------------|-------------|
| O | -3.45999400 | 0.67085900  | 1.34337500  |
| C | -2.59631700 | 1.03293800  | 0.43931700  |
| C | -4.59654600 | 0.01171800  | 0.72826900  |
| H | -4.44594400 | -1.06182800 | 0.84406300  |
| C | -3.14007500 | 0.96242000  | -0.97106000 |
| H | -2.53444200 | 0.29962000  | -1.59129500 |
| C | -4.54511600 | 0.39247900  | -0.76319400 |
| H | -5.26079100 | 1.19364600  | -0.97288200 |
| O | -3.22468700 | 2.26822400  | -1.48944900 |
| H | -2.32417400 | 2.61197900  | -1.55614200 |
| O | -4.77553800 | -0.71464500 | -1.60322700 |
| H | -5.70495500 | -0.95636800 | -1.51896000 |

TS2''''

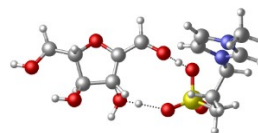

|   |            |             |             |
|---|------------|-------------|-------------|
| O | 3.29073100 | -1.01729200 | -1.44032900 |
| C | 2.14936800 | -0.49249200 | -0.84229100 |
| C | 4.04903400 | -1.54855100 | -0.36031400 |
| H | 3.64786200 | -2.52832100 | -0.06649600 |
| C | 2.41684100 | -0.05392300 | 0.46599800  |
| H | 1.63673400 | -0.01006900 | 1.21600600  |
| C | 3.80642900 | -0.56410200 | 0.80138300  |
| H | 4.52844700 | 0.25912400  | 0.70830000  |
| O | 2.70822600 | 1.79206300  | 0.46937700  |
| H | 3.16084800 | 2.07989900  | 1.27398700  |
| O | 3.83457200 | -1.13662300 | 2.07589500  |
| H | 4.70350100 | -1.54592900 | 2.17993600  |

|        |             |             |             |        |             |             |             |
|--------|-------------|-------------|-------------|--------|-------------|-------------|-------------|
| O      | -2.51827500 | -1.75959700 | -0.30047600 | C      | 0.92119200  | -0.63572200 | -1.44500700 |
| H      | -3.14865600 | -1.94999900 | -1.00565600 | H      | 0.91081100  | -1.21854000 | -2.37405100 |
| C      | -1.32101100 | 1.45987200  | 0.75079900  | O      | -0.18642000 | -0.16750300 | -0.99887500 |
| H      | -0.79157000 | 0.18591500  | 0.98169200  | H      | -0.53716200 | 1.13068900  | -1.18691800 |
| H      | -1.13551900 | 1.86378800  | 1.74568800  | C      | 5.51227000  | -1.65546700 | -0.72261400 |
| O      | -0.61990300 | 2.05429100  | -0.30239800 | H      | 5.67364100  | -2.44492000 | -1.46124400 |
| H      | 0.07268600  | 1.44444700  | -0.60544700 | H      | 5.85399200  | -0.70015800 | -1.13573200 |
| C      | -5.87156300 | 0.46136000  | 1.40584500  | O      | 6.15574800  | -1.94792500 | 0.51189700  |
| H      | -5.89136400 | 0.13905500  | 2.45083400  | H      | 7.09145600  | -2.10803900 | 0.37018300  |
| H      | -5.95076400 | 1.55412200  | 1.36197900  | C      | -2.68107700 | -1.78314300 | -0.27117100 |
| O      | -6.88472300 | -0.16657800 | 0.63774700  | C      | -3.29239400 | -2.97755500 | -0.05406100 |
| H      | -7.74951300 | 0.03948400  | 0.99933400  | C      | -4.81052500 | -1.39956700 | 0.15173700  |
| S      | 0.78643000  | -1.24872300 | 0.05960300  | H      | -1.66360200 | -1.50641100 | -0.52198400 |
| O      | 1.10731700  | -0.10450100 | -0.82158300 | H      | -2.90581900 | -3.98262000 | -0.06888100 |
| O      | -0.05475100 | -0.77419500 | 1.23243900  | H      | -5.75051300 | -0.89448200 | 0.30806200  |
| O      | 0.24462900  | -2.42735800 | -0.59675000 | N      | -3.65174800 | -0.81378600 | -0.13852900 |
| H      | -1.73561800 | -2.30116000 | -0.46315900 | N      | -4.62057600 | -2.71595000 | 0.20785800  |
| C      | 2.34200700  | -1.72464900 | 0.80711200  | C      | -3.41676400 | 0.63308500  | -0.26842600 |
| H      | 2.71724400  | -0.82200000 | 1.29389200  | H      | -2.87025100 | 0.79295100  | -1.19789300 |
| H      | 2.11620600  | -2.47030400 | 1.56925500  | H      | -4.39444900 | 1.11057700  | -0.35648100 |
| C      | 3.27434300  | -2.26044000 | -0.28759600 | C      | -2.64631500 | 1.17018200  | 0.93744900  |
| H      | 3.20219800  | -3.34728900 | -0.33666600 | H      | -3.23031000 | 0.99273600  | 1.84384200  |
| H      | 2.96468800  | -1.90062100 | -1.27291900 | H      | -1.70137800 | 0.62764400  | 1.04730900  |
| C      | 4.73467600  | -1.90568300 | -0.06109400 | C      | -5.64813700 | -3.72316100 | 0.48292700  |
| H      | 5.35547800  | -2.35388800 | -0.83831300 | H      | -5.37531200 | -4.28115600 | 1.37697100  |
| H      | 5.08237000  | -2.25594300 | 0.91261200  | H      | -6.59934100 | -3.22031000 | 0.64249700  |
| C      | 4.15759300  | 0.51988200  | -0.67455500 | H      | -5.72952100 | -4.39459900 | -0.37015100 |
| C      | 6.04722000  | 0.15675400  | 0.39951900  | C      | -2.36941500 | 2.66874900  | 0.81023900  |
| C      | 4.79059900  | 1.71167300  | -0.51032300 | H      | -3.14698600 | 3.20758100  | 0.26459700  |
| H      | 4.49965200  | 2.70678100  | -0.80236900 | H      | -2.23996800 | 3.14087900  | 1.78466200  |
| N      | 4.96365900  | -0.44041800 | -0.09545700 | S      | -0.83509100 | 3.00941800  | -0.05368200 |
| N      | 5.96773300  | 1.46239200  | 0.15967800  | O      | 0.23229300  | 2.46257300  | 0.80120700  |
| H      | 6.85899000  | -0.33893500 | 0.90835800  | H      | 1.79446600  | 2.18046700  | 0.50938300  |
| H      | 3.19177400  | 0.29703200  | -1.10846100 | O      | -0.93076500 | 2.12127800  | -1.32647400 |
| C      | 6.95706900  | 2.47119000  | 0.54872700  | O      | -0.79594300 | 4.39848800  | -0.40862300 |
| H      | 6.49247800  | 3.18864300  | 1.22294000  |        |             |             |             |
| H      | 7.78296900  | 1.97581200  | 1.05435500  |        |             |             |             |
| H      | 7.32408800  | 2.97468200  | -0.34395200 |        |             |             |             |
| TS3''' |             |             |             | TS4''' |             |             |             |

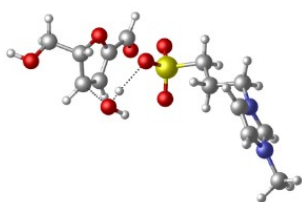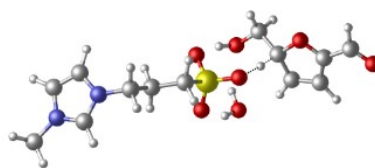

|   |             |             |             |
|---|-------------|-------------|-------------|
| O | -3.79542800 | -0.08690800 | -0.83820700 |
| C | -3.73275200 | -0.81847000 | 0.24598700  |
| C | -3.69440300 | 1.29013500  | -0.43635100 |
| H | -2.87117000 | 1.73643800  | -0.99486400 |
| C | -3.58742200 | -0.10555000 | 1.41803000  |
| H | -3.55848700 | -0.54067200 | 2.40343100  |
| C | -3.46187500 | 1.23303000  | 1.04214300  |
| H | -3.64708800 | 2.10058800  | 1.65744400  |
| O | -1.49471200 | 1.76098400  | 1.22021700  |
| H | -1.08941800 | 1.03615700  | 1.73110700  |
| C | -3.90130100 | -2.30919400 | 0.09136700  |
| H | -3.82529100 | -2.69078200 | -0.93502400 |
| O | -4.12791200 | -2.97546700 | 1.05632600  |
| C | -5.01733200 | 1.98031200  | -0.77399700 |
| H | -5.15721100 | 1.93905300  | -1.85788400 |
| H | -5.83916000 | 1.44379800  | -0.28533200 |
| O | -4.88092200 | 3.29566500  | -0.29422800 |
| H | -5.62903600 | 3.82709700  | -0.57728200 |
| C | 4.96793500  | 0.99749100  | -1.16382300 |
| C | 5.99111900  | 1.53134100  | -0.44646800 |
| C | 5.47938900  | -0.41481800 | 0.43988000  |
| H | 4.43436500  | 1.37185900  | -2.02167800 |
| H | 6.52492400  | 2.46000600  | -0.55924300 |
| H | 5.47608000  | -1.28030600 | 1.08373500  |
| N | 4.66919500  | -0.22032000 | -0.59630300 |
| N | 6.29433500  | 0.63253600  | 0.55202300  |
| C | 3.56734100  | -1.11214800 | -1.00500500 |
| H | 3.61260700  | -1.20280300 | -2.09163000 |
| H | 3.77682000  | -2.09337200 | -0.57550000 |
| C | 2.22549800  | -0.57092400 | -0.52884100 |
| H | 2.24383500  | -0.44151700 | 0.55723400  |
| H | 2.02962900  | 0.40729800  | -0.97783100 |
| C | 7.33802300  | 0.80560400  | 1.56715600  |
| H | 7.11077100  | 1.68456300  | 2.16791700  |
| H | 7.35604400  | -0.07683800 | 2.20276000  |
| H | 8.30215000  | 0.92131000  | 1.07527300  |
| C | 1.09913500  | -1.52550200 | -0.89333800 |

|   |             |             |             |
|---|-------------|-------------|-------------|
| O | 4.51922400  | -0.58446500 | 0.88208700  |
| C | 5.38230100  | -0.77283200 | -0.08276600 |
| C | 3.67204800  | 0.47800600  | 0.49735700  |
| H | 2.63451500  | -0.06882400 | 0.11403100  |
| C | 5.23712900  | 0.13453100  | -1.12164300 |
| H | 5.82733600  | 0.15333100  | -2.02369300 |
| C | 4.18787900  | 0.95991600  | -0.74169000 |
| H | 3.71522200  | 1.76508700  | -1.29814500 |
| O | 1.90509600  | 2.71806000  | -1.62524500 |
| H | 1.10672400  | 2.18566500  | -1.74636700 |
| C | 6.34010100  | -1.91416600 | 0.06200400  |
| H | 6.24420900  | -2.50538900 | 0.98680400  |
| O | 7.14709500  | -2.13690200 | -0.79097100 |
| C | 3.23511400  | 1.34220300  | 1.69617200  |
| H | 2.83421300  | 0.66656600  | 2.45722600  |
| H | 4.11715900  | 1.84438400  | 2.09858600  |
| O | 2.31046900  | 2.30752900  | 1.30150900  |
| H | 1.41789900  | 1.92522300  | 1.38404200  |
| C | -5.45297300 | -0.26169200 | 1.36353300  |
| C | -6.61677500 | 0.31903100  | 0.97155900  |
| C | -5.75613700 | -0.72084300 | -0.76460500 |
| H | -4.95371600 | -0.26998700 | 2.31817700  |
| H | -7.33198400 | 0.90970100  | 1.51906300  |
| H | -5.60868300 | -1.10260300 | -1.76256500 |
| N | -4.93564700 | -0.91104400 | 0.26518100  |
| N | -6.78645900 | 0.02031900  | -0.36239600 |
| C | -3.63256800 | -1.59972900 | 0.21307700  |
| H | -3.56258300 | -2.22326900 | 1.10580200  |
| H | -3.65153900 | -2.25677600 | -0.65787500 |
| C | -2.50021600 | -0.58423200 | 0.12982200  |
| H | -2.63373300 | 0.04425900  | -0.75518700 |
| H | -2.51786000 | 0.07118800  | 1.00539100  |
| C | -7.91734300 | 0.44588900  | -1.19357100 |
| H | -7.96464300 | 1.53324100  | -1.20169300 |
| H | -7.76363900 | 0.08001900  | -2.20612300 |
| H | -8.83782500 | 0.02905100  | -0.78894700 |
| C | -1.14196100 | -1.26918300 | 0.04975400  |
| H | -0.90359700 | -1.84887400 | 0.94271200  |

|   |             |             |             |   |             |             |             |
|---|-------------|-------------|-------------|---|-------------|-------------|-------------|
| H | 0.95804200  | -1.62488300 | -1.97109500 | H | -1.03756000 | -1.89451900 | -0.83857500 |
| H | 1.23364000  | -2.51469500 | -0.45088400 | S | 0.11694600  | 0.00472700  | -0.08573400 |
| S | -0.45818500 | -0.91310500 | -0.23729900 | O | -0.21826700 | 0.77404900  | -1.28459400 |
| O | -0.23010600 | -0.71711700 | 1.21039400  | H | 1.84556400  | 3.04989900  | -0.72259200 |
| H | -1.12282400 | 1.56487300  | 0.33156400  | O | 0.05249900  | 0.76812100  | 1.17576000  |
| O | -0.69019800 | 0.38801300  | -0.92773800 | O | 1.40745100  | -0.75505900 | -0.20252500 |
| O | -1.45235700 | -1.93902500 | -0.57000300 |   |             |             |             |

IMd

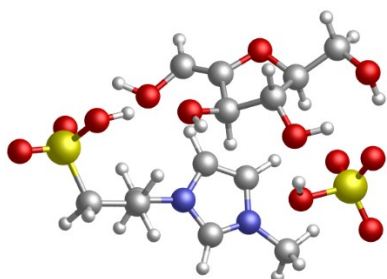

|   |             |             |             |
|---|-------------|-------------|-------------|
| O | 0.98837500  | -2.45547800 | 1.66334100  |
| C | -0.16852800 | -1.85634700 | 1.25112900  |
| C | 1.97895900  | -2.18465600 | 0.65459500  |
| H | 2.36565500  | -1.16717400 | 0.79495600  |
| C | -0.09100000 | -1.50370500 | -0.21402500 |
| H | 0.09888800  | -0.42722000 | -0.34427200 |
| C | 1.15600500  | -2.26424700 | -0.63319000 |
| H | 0.89146400  | -3.31584700 | -0.81410600 |
| O | -1.27208700 | -1.87469900 | -0.91348100 |
| H | -1.04963500 | -1.99371600 | -1.84374400 |
| O | 1.71683400  | -1.68501300 | -1.78666600 |
| H | 2.61093600  | -2.04906100 | -1.88922100 |
| C | -1.20063700 | -1.59669900 | 2.04311200  |
| H | -1.24402600 | -1.87284800 | 3.08926200  |
| O | -2.22603300 | -0.83882200 | 1.51164400  |
| H | -3.08565100 | -1.01127000 | 1.91482500  |
| C | 3.10257900  | -3.20091400 | 0.71264900  |
| H | 3.70942100  | -3.05125400 | 1.61117400  |
| H | 2.67418000  | -4.20592700 | 0.74560000  |
| O | 3.87282300  | -3.10486100 | -0.46775000 |
| H | 4.29405400  | -2.22722900 | -0.49177300 |
| C | -0.27797100 | 1.60946900  | 1.64885700  |
| C | 1.00891700  | 2.04752100  | 1.59564900  |
| C | -0.13329800 | 3.11540300  | 0.05313700  |
| H | -0.75460200 | 0.86682300  | 2.26278700  |
| H | 1.89888400  | 1.73474700  | 2.11626500  |
| H | -0.38397700 | 3.77679200  | -0.76002400 |
| N | -0.97754500 | 2.28936700  | 0.67542600  |
| N | 1.06838500  | 2.99455300  | 0.60255300  |

TS<sub>d-e</sub>

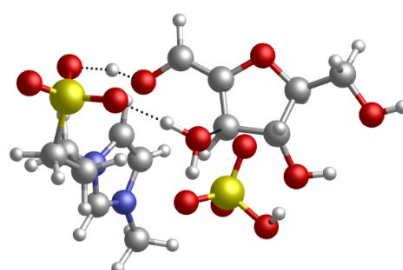

|   |             |             |             |
|---|-------------|-------------|-------------|
| O | 2.24659600  | -2.33310900 | 1.52920400  |
| C | 1.10303400  | -1.69373000 | 1.07374200  |
| C | 3.31727100  | -1.75672200 | 0.77575000  |
| H | 3.59710900  | -0.78190700 | 1.19066600  |
| C | 1.28464900  | -1.15558800 | -0.21365100 |
| H | 0.71444600  | -0.32882000 | -0.61597800 |
| C | 2.68487600  | -1.54364000 | -0.60982200 |
| H | 2.59860800  | -2.52841800 | -1.09024800 |
| O | 0.29101800  | -2.40144300 | -1.47088700 |
| H | 0.15238300  | -1.98504900 | -2.32923800 |
| O | 3.33894800  | -0.63919000 | -1.45807200 |
| H | 4.26489400  | -0.91737400 | -1.48878100 |
| C | -0.04609900 | -1.63673400 | 1.79726800  |
| H | -0.12435800 | -2.17986000 | 2.73975700  |
| O | -1.06535400 | -0.93800400 | 1.37625100  |
| H | -2.01894300 | -1.40522100 | 1.43287600  |
| C | 4.47964200  | -2.72261300 | 0.73764500  |
| H | 4.98171100  | -2.76153900 | 1.70813900  |
| H | 4.10655200  | -3.72037300 | 0.48209900  |
| O | 5.34753500  | -2.22397400 | -0.27682800 |
| H | 6.14915200  | -2.74940800 | -0.31419600 |
| C | -1.39889600 | 2.15428300  | 1.53504300  |
| C | -0.72794700 | 3.33292800  | 1.46453100  |
| C | -2.05732300 | 3.20462600  | -0.27577700 |
| H | -1.32913600 | 1.33199000  | 2.22505900  |
| H | 0.06041200  | 3.73898900  | 2.07304800  |
| H | -2.56028900 | 3.43861100  | -1.19910000 |
| N | -2.23667700 | 2.10156900  | 0.44425900  |
| N | -1.16586900 | 3.97718500  | 0.33126600  |



|   |             |             |             |   |             |             |             |
|---|-------------|-------------|-------------|---|-------------|-------------|-------------|
| C | -2.39779900 | 2.10984300  | 0.35216200  | C | -3.17269800 | 1.02030100  | 0.12233900  |
| H | -2.84656600 | 1.55778800  | 1.17598700  | H | -3.28459000 | 0.41752700  | 1.02111800  |
| H | -2.86137200 | 3.09758400  | 0.29656700  | H | -4.14265800 | 1.47493600  | -0.09501200 |
| C | -2.56167600 | 1.34911900  | -0.96114900 | C | -2.70706400 | 0.16450400  | -1.05314700 |
| H | -2.08921200 | 1.91237600  | -1.77097400 | H | -2.64814700 | 0.78376400  | -1.95258800 |
| H | -2.03381100 | 0.39467200  | -0.88973200 | H | -1.69717800 | -0.20351500 | -0.85558200 |
| C | 2.26868900  | 3.72742600  | 0.17970600  | C | -0.64827300 | 5.24567500  | -0.17820600 |
| H | 3.10135300  | 3.38094300  | 0.78647000  | H | -0.77223700 | 6.01076300  | 0.58697700  |
| H | 2.49040900  | 3.48547700  | -0.85799900 | H | 0.40436600  | 5.10181700  | -0.41883800 |
| H | 2.10230700  | 4.79442900  | 0.32214600  | H | -1.21862800 | 5.51938900  | -1.06378100 |
| C | -4.02279000 | 1.12224900  | -1.34154100 | C | -3.68491000 | -0.98545600 | -1.29974100 |
| H | -4.65266000 | 1.99425300  | -1.14708700 | H | -4.72430200 | -0.69089200 | -1.13579400 |
| H | -4.12635000 | 0.84784400  | -2.39174400 | H | -3.59950200 | -1.37978000 | -2.31294100 |
| S | -4.81437700 | -0.22070300 | -0.45214600 | S | -3.41259500 | -2.42366800 | -0.24261800 |
| O | -3.94614800 | -1.47667900 | -0.88818600 | O | -2.10612300 | -2.97809700 | -0.66606400 |
| H | -3.03086700 | -1.51628600 | -0.52056900 | H | -0.61553700 | -2.62058500 | -1.11978000 |
| O | -4.66049000 | 0.01106600  | 0.97608400  | O | -3.29725100 | -1.87109200 | 1.16038900  |
| O | -6.12293500 | -0.41851900 | -1.00816100 | O | -4.55452700 | -3.29287200 | -0.42266800 |
| H | 2.04995400  | 0.09206600  | -1.53778100 | H | 3.07114400  | 1.15631700  | -1.61531800 |
| S | 3.79926200  | 0.86129100  | -0.51856800 | S | 1.71923000  | 2.15757200  | -0.33315000 |
| O | 3.59643800  | 0.94398200  | 0.93543200  | O | 1.76440700  | 3.54690200  | 0.11237300  |
| O | 4.26564000  | -0.45798700 | -0.97257900 | O | 0.43677500  | 1.77645000  | -0.96883600 |
| O | 2.25318400  | 0.95044800  | -1.11834700 | O | 2.83280000  | 2.09467100  | -1.49978900 |
| O | 4.47296100  | 2.00886400  | -1.09608000 | O | 2.13878000  | 1.16199300  | 0.66933000  |

IMe

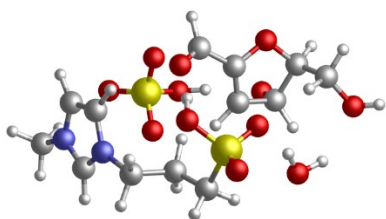

|   |             |             |             |
|---|-------------|-------------|-------------|
| O | -2.35879900 | -1.98888600 | 1.59241600  |
| C | -1.35033000 | -1.20655200 | 1.10131100  |
| C | -3.12673200 | -2.39280900 | 0.44311100  |
| H | -3.43154500 | -3.43004600 | 0.58278700  |
| C | -1.23047400 | -1.20151300 | -0.22427600 |
| H | -0.44181600 | -0.74608100 | -0.80171500 |
| C | -2.18295900 | -2.23208600 | -0.75473800 |
| H | -2.71012300 | -1.92686200 | -1.65740600 |
| O | -3.31194600 | 0.50987500  | -2.11829700 |
| H | -4.01717700 | -0.14549700 | -2.07272100 |
| O | -1.41927900 | -3.41886500 | -0.99743000 |
| H | -1.79925300 | -3.91495100 | -1.72708900 |
| C | -0.48900300 | -0.59847900 | 2.14335000  |

IMd'

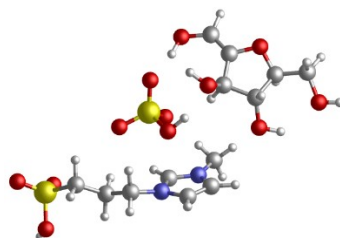

|   |             |             |             |
|---|-------------|-------------|-------------|
| O | -5.37998100 | 1.32515000  | 0.06706400  |
| C | -4.04769500 | 1.74304000  | 0.14319600  |
| C | -5.34385000 | -0.06805100 | 0.29090300  |
| H | -5.20565700 | -0.28360000 | 1.36123300  |
| C | -3.14311000 | 0.64305500  | -0.34832600 |
| H | -2.34726500 | 0.43132000  | 0.37645000  |
| C | -4.09975600 | -0.54591600 | -0.46707200 |
| H | -4.34267400 | -0.66590400 | -1.52978400 |
| O | -2.57072900 | 0.88193300  | -1.64231800 |
| H | -2.17374600 | 1.76549600  | -1.63538800 |
| O | -3.55775500 | -1.74585500 | 0.05632100  |
| H | -4.28909200 | -2.37788300 | 0.05701100  |
| C | -3.75819200 | 2.93263700  | 0.67119200  |

|                     |             |             |             |      |             |             |             |
|---------------------|-------------|-------------|-------------|------|-------------|-------------|-------------|
| H                   | -0.23611300 | -1.26055600 | 2.97992900  | H    | -4.57293400 | 3.54975200  | 1.03352600  |
| O                   | -0.11710500 | 0.55770500  | 2.12744100  | O    | -2.55972800 | 3.52176500  | 0.80891800  |
| H                   | -0.61519200 | 2.05925500  | 1.64443000  | H    | -1.81840200 | 3.03755100  | 0.39713500  |
| C                   | -4.32367200 | -1.44938300 | 0.37599300  | C    | -6.61888400 | -0.70431200 | -0.21377700 |
| H                   | -4.99077700 | -1.66520100 | 1.21399200  | H    | -7.47317600 | -0.40504900 | 0.39975500  |
| H                   | -3.96690700 | -0.41797300 | 0.47420400  | H    | -6.78786100 | -0.38738800 | -1.24847500 |
| O                   | -4.98444800 | -1.64166100 | -0.87218400 | O    | -6.39399000 | -2.11177000 | -0.13591700 |
| H                   | -5.91897000 | -1.45067600 | -0.77001700 | H    | -7.16695500 | -2.58146000 | -0.45467400 |
| C                   | 2.82150500  | 1.29132400  | 1.04934500  | S    | 0.32175100  | 1.27328200  | -0.12646100 |
| C                   | 3.91224400  | 0.48540600  | 0.98991900  | O    | 1.77212400  | 1.35372700  | -0.25275500 |
| C                   | 3.64412500  | 1.40343800  | -0.98401300 | O    | -0.13714500 | 0.81402600  | 1.19171400  |
| H                   | 2.10422500  | 1.44941000  | 1.83806100  | O    | -0.45608900 | 2.42489000  | -0.61882700 |
| H                   | 4.32921700  | -0.19435600 | 1.71268300  | O    | -0.04180600 | 0.06132100  | -1.16627100 |
| H                   | 3.76614200  | 1.64178500  | -2.02730600 | H    | -0.96433600 | 0.17058200  | -1.48926000 |
| N                   | 2.68469300  | 1.87252800  | -0.19166200 | C    | 0.63548500  | -2.84196700 | -0.93296700 |
| N                   | 4.41817400  | 0.58377300  | -0.28562100 | C    | -0.43896400 | -2.92961400 | -0.10888000 |
| C                   | 1.56547600  | 2.71264900  | -0.62000100 | C    | 1.06304900  | -1.65293700 | 0.86217000  |
| H                   | 1.29545300  | 3.34713500  | 0.22486600  | H    | 0.80385500  | -3.23956500 | -1.91849700 |
| H                   | 1.92193700  | 3.35385600  | -1.42915700 | H    | -1.39521500 | -3.40850800 | -0.22864000 |
| C                   | 0.37919600  | 1.86029000  | -1.06677900 | H    | 1.50762300  | -0.95479600 | 1.54988200  |
| H                   | 0.64196400  | 1.30137900  | -1.96707700 | N    | 1.57022700  | -2.04836000 | -0.30331400 |
| H                   | 0.18878400  | 1.10290400  | -0.30584800 | N    | -0.14433800 | -2.18507400 | 1.00979300  |
| C                   | 5.53330300  | -0.19960100 | -0.81607400 | C    | 2.70503300  | -1.42172100 | -0.99987600 |
| H                   | 6.41169400  | -0.03023000 | -0.19507100 | H    | 3.11703200  | -2.17486800 | -1.67426600 |
| H                   | 5.23265000  | -1.24721700 | -0.80227800 | H    | 2.28017400  | -0.59921800 | -1.57913000 |
| H                   | 5.73545200  | 0.13313300  | -1.83235900 | C    | 3.77288300  | -0.90053900 | -0.04941300 |
| C                   | -0.86135000 | 2.71356200  | -1.32503600 | H    | 3.32377700  | -0.33999000 | 0.76950100  |
| H                   | -0.62493100 | 3.71907300  | -1.67926500 | H    | 4.36136000  | -1.72545700 | 0.35935100  |
| H                   | -1.54062800 | 2.23592800  | -2.03584000 | C    | -1.03835500 | -1.92743600 | 2.13993700  |
| S                   | -1.86794100 | 2.94505300  | 0.15169500  | H    | -0.75318000 | -0.97123100 | 2.57367600  |
| O                   | -2.66584900 | 1.74125000  | 0.34844500  | H    | -2.05208100 | -1.85607700 | 1.74807300  |
| H                   | -3.21768400 | 0.82487000  | -1.20894500 | H    | -0.95713500 | -2.73531700 | 2.86698000  |
| O                   | -0.79435000 | 2.98318900  | 1.32718900  | C    | 4.65911300  | 0.07442200  | -0.81237800 |
| O                   | -2.49811300 | 4.23598700  | 0.09588500  | H    | 5.04459600  | -0.32246900 | -1.75438000 |
| H                   | 0.47895300  | -3.20863000 | -0.67512300 | H    | 4.12995300  | 1.01335500  | -0.99699700 |
| S                   | 2.13462600  | -1.95954400 | -0.01769500 | S    | 6.10315000  | 0.51956900  | 0.12806200  |
| O                   | 1.55221600  | -1.81500700 | 1.32669100  | O    | 5.77112000  | 0.71840700  | 1.52119600  |
| O                   | 3.55784700  | -2.28863400 | -0.02117600 | O    | 6.87777900  | -0.91363200 | 0.03527500  |
| O                   | 1.45315400  | -3.26121100 | -0.68430700 | O    | 6.86336600  | 1.50164200  | -0.59653300 |
| O                   | 1.79537500  | -0.81501400 | -0.89460200 | H    | 7.37381800  | -1.04765100 | 0.85473600  |
| TS <sub>d-e</sub> ' |             |             |             | IMe' |             |             |             |

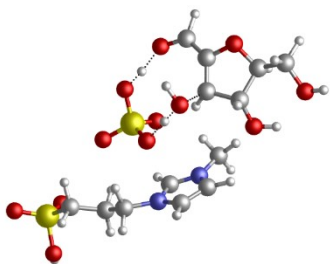

|   |             |             |             |
|---|-------------|-------------|-------------|
| O | -5.23634200 | -1.39425800 | 0.05492900  |
| C | -3.86137600 | -1.64312200 | -0.14459600 |
| C | -5.38053600 | -0.01423200 | -0.21363400 |
| H | -5.39793900 | 0.16131000  | -1.29985000 |
| C | -3.09596100 | -0.50391400 | 0.16041300  |
| H | -2.16052200 | -0.31597200 | -0.36017400 |
| C | -4.10011600 | 0.62398400  | 0.35035400  |
| H | -4.21881300 | 0.81301200  | 1.42337500  |
| O | -2.34682000 | -0.59381400 | 1.80312600  |
| H | -2.43280100 | -1.52432200 | 2.05014100  |
| O | -3.71928100 | 1.80980400  | -0.32010200 |
| H | -4.50217600 | 2.37641500  | -0.31136900 |
| C | -3.45813600 | -2.84580400 | -0.71511100 |
| H | -4.27571300 | -3.48787200 | -1.07096000 |
| O | -2.28242400 | -3.26344400 | -0.85610500 |
| H | -1.18634000 | -2.84117800 | -0.17336800 |
| C | -6.63472300 | 0.53021300  | 0.42922400  |
| H | -7.52727400 | 0.11876400  | -0.05019100 |
| H | -6.64001300 | 0.26459000  | 1.49171100  |
| O | -6.55448500 | 1.94405800  | 0.25174100  |
| H | -7.33068000 | 2.36515200  | 0.62584800  |
| S | 0.41724000  | -1.30932600 | 0.08023600  |
| O | 1.85727600  | -1.50759900 | 0.19737300  |
| O | -0.04441600 | -0.89629500 | -1.25527700 |
| O | -0.34284300 | -2.61156000 | 0.46592500  |
| O | -0.02532000 | -0.28408800 | 1.11592300  |
| H | -1.31314600 | -0.44510900 | 1.59277700  |
| C | 0.39923300  | 2.65255300  | 0.95921300  |
| C | -0.64893600 | 2.71546600  | 0.09922500  |
| C | 0.98577500  | 1.62952800  | -0.89101200 |
| H | 0.49827300  | 2.98638800  | 1.97706800  |
| H | -1.64587700 | 3.10753900  | 0.20687500  |
| H | 1.51275800  | 1.02534900  | -1.60823700 |
| N | 1.41747700  | 1.98093000  | 0.31748800  |
| N | -0.25474800 | 2.07406600  | -1.05323900 |
| C | 2.57005100  | 1.39403600  | 1.02055500  |
| H | 2.94187900  | 2.15267000  | 1.71205800  |

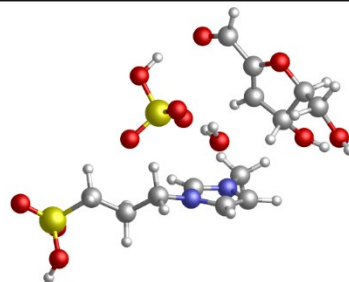

|   |             |             |             |
|---|-------------|-------------|-------------|
| O | 4.52992100  | 0.97917000  | 1.25223300  |
| C | 3.60159200  | 1.52981100  | 0.39598900  |
| C | 4.81098100  | -0.32159900 | 0.73018800  |
| H | 5.72644400  | -0.26839200 | 0.12659800  |
| C | 3.08901400  | 0.69089300  | -0.50332500 |
| H | 2.30970400  | 0.94426700  | -1.21140700 |
| C | 3.63537700  | -0.67417800 | -0.19941300 |
| H | 2.87815600  | -1.24293200 | 0.35835300  |
| O | 1.19545100  | -0.79175800 | 2.08541400  |
| H | 1.24362000  | -0.40796300 | 2.96407000  |
| O | 4.03957400  | -1.40761400 | -1.34447500 |
| H | 4.53942700  | -2.16344300 | -1.01162900 |
| C | 3.28712800  | 2.94800500  | 0.63780600  |
| H | 3.88291300  | 3.42607600  | 1.43496700  |
| O | 2.44950600  | 3.56353200  | 0.02612100  |
| H | 0.56758500  | 3.75373100  | -0.33682200 |
| C | 4.97154500  | -1.32298300 | 1.84972100  |
| H | 5.83904700  | -1.08441200 | 2.47180200  |
| H | 4.06261600  | -1.32083300 | 2.46056500  |
| O | 5.13892100  | -2.57132300 | 1.18017700  |
| H | 5.22567000  | -3.27590900 | 1.82502000  |
| S | -0.37227800 | 1.87436700  | -0.53346600 |
| O | -1.79023000 | 1.51110000  | -0.55479600 |
| O | 0.33530100  | 1.54393400  | -1.78195500 |
| O | -0.36191300 | 3.46918500  | -0.39180500 |
| O | 0.33185600  | 1.35388800  | 0.65874200  |
| H | 0.93948300  | -0.03930800 | 1.51520400  |
| C | 0.24825600  | -2.58831700 | 0.00514300  |
| C | 1.08516900  | -2.55730500 | -1.06275300 |
| C | -0.53666400 | -1.11583400 | -1.42994700 |
| H | 0.31188800  | -3.11674600 | 0.93918700  |
| H | 2.00849500  | -3.07182000 | -1.26264600 |
| H | -1.12964800 | -0.33437700 | -1.87654400 |
| N | -0.76122900 | -1.68445700 | -0.24526400 |
| N | 0.58131700  | -1.62082100 | -1.94016400 |
| C | -1.76572200 | -1.22448300 | 0.72766800  |
| H | -1.77226900 | -1.95820700 | 1.53439700  |

|   |             |             |             |   |             |             |             |
|---|-------------|-------------|-------------|---|-------------|-------------|-------------|
| H | 2.16879200  | 0.54656300  | 1.58097900  | H | -1.40638300 | -0.27210700 | 1.12096800  |
| C | 3.67196200  | 0.93204100  | 0.07839900  | C | -3.14648000 | -1.06918500 | 0.09963100  |
| H | 3.25963400  | 0.36063700  | -0.75233800 | H | -3.07026800 | -0.60739600 | -0.88451000 |
| H | 4.22965100  | 1.78675600  | -0.31236500 | H | -3.63082500 | -2.04279600 | -0.00636200 |
| C | -1.07719500 | 1.81737700  | -2.23693400 | C | 1.21794600  | -1.16062500 | -3.17631500 |
| H | -0.82568800 | 0.82173800  | -2.60036000 | H | 0.89533200  | -0.13421500 | -3.34737800 |
| H | -2.12011500 | 1.84003800  | -1.92557100 | H | 2.29632900  | -1.18579500 | -3.02039900 |
| H | -0.88809100 | 2.57827100  | -2.99388100 | H | 0.93442500  | -1.80732000 | -4.00602900 |
| C | 4.58829500  | -0.01518500 | 0.84092700  | C | -3.97521400 | -0.13915800 | 0.97431100  |
| H | 4.93502600  | 0.37870200  | 1.79901200  | H | -3.99858300 | -0.42980800 | 2.02719300  |
| H | 4.09917600  | -0.98148200 | 0.99185800  | H | -3.61884600 | 0.89068300  | 0.88118600  |
| S | 6.07200700  | -0.36680400 | -0.07797300 | S | -5.67957500 | -0.10076100 | 0.46740600  |
| O | 5.78224800  | -0.53977800 | -1.48417900 | O | -5.79394600 | -0.07990100 | -0.97388900 |
| O | 6.78011500  | 1.09732000  | 0.06990100  | O | -6.08529900 | -1.60830200 | 0.94551900  |
| O | 6.86183000  | -1.33229600 | 0.63724100  | O | -6.40124800 | 0.84734900  | 1.27397500  |
| H | 7.26661300  | 1.28312200  | -0.74512300 | H | -6.78599500 | -1.93607300 | 0.36485400  |

IMa

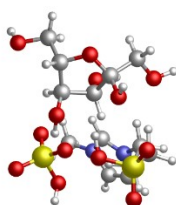

|   |            |             |             |
|---|------------|-------------|-------------|
| O | 3.35484300 | -1.84974000 | 0.54902300  |
| C | 2.64734500 | -0.72288400 | 0.96832300  |
| C | 2.57799400 | -2.63176600 | -0.38243500 |
| H | 3.13833500 | -2.74318500 | -1.31223600 |
| C | 1.16978000 | -0.95250600 | 0.60203400  |
| H | 0.68405200 | -0.01684800 | 0.32209500  |
| C | 1.29578900 | -1.84339600 | -0.64091100 |
| H | 0.42753500 | -2.50185400 | -0.73397300 |
| O | 0.44627200 | -1.62284300 | 1.62139500  |
| H | 0.56563500 | -1.12261300 | 2.43736800  |
| O | 1.48097800 | -1.04556400 | -1.78618800 |
| H | 0.60682500 | -0.67542400 | -2.00124500 |
| O | 3.03786100 | 0.42942800  | 0.25067000  |
| H | 3.99921400 | 0.46377400  | 0.18241000  |
| C | 2.91316500 | -0.54511300 | 2.45702000  |
| H | 3.93437100 | -0.18033700 | 2.59846900  |
| H | 2.80316900 | -1.51119400 | 2.95656000  |
| O | 1.95264900 | 0.39166000  | 2.94854000  |
| H | 2.25870600 | 0.75915900  | 3.78068400  |
| C | 2.33399500 | -3.99229000 | 0.24695000  |
| H | 3.29045100 | -4.39106400 | 0.60348100  |

IMb

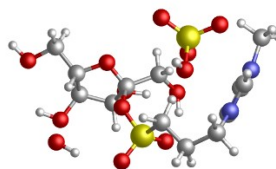

|   |             |             |             |
|---|-------------|-------------|-------------|
| O | -2.23240800 | -1.49891900 | 0.32702800  |
| C | -1.80991900 | -0.28711200 | 0.80242900  |
| C | -3.53580800 | -1.30100600 | -0.22947200 |
| H | -3.45299600 | -0.85684100 | -1.22725900 |
| C | -3.04595600 | 0.39940900  | 1.43171200  |
| H | -3.04719600 | 1.47829900  | 1.24431000  |
| C | -4.21310300 | -0.29420000 | 0.71579300  |
| H | -4.78453100 | -0.82198800 | 1.48574000  |
| O | -3.14075500 | 0.09408400  | 2.80064600  |
| H | -2.33472000 | 0.41437500  | 3.22853500  |
| O | -5.03943000 | 0.62189000  | 0.02999400  |
| H | -5.76129400 | 0.10695200  | -0.35202300 |
| O | -3.84359600 | 1.30243300  | -2.52600400 |
| H | -4.24089200 | 1.30489700  | -1.64629000 |
| C | -0.58810200 | -0.48764000 | 1.69775400  |
| H | 0.30845300  | -0.61364700 | 1.08361400  |
| H | -0.76068500 | -1.42192300 | 2.23106700  |
| O | -0.43648300 | 0.52431300  | 2.68158800  |
| H | -0.29312100 | 1.35927300  | 2.21478100  |
| C | -4.26871000 | -2.62048700 | -0.29161800 |
| H | -3.82017600 | -3.27924800 | -1.04029400 |

|                                                                                     |             |             |             |                                                                                      |             |             |             |
|-------------------------------------------------------------------------------------|-------------|-------------|-------------|--------------------------------------------------------------------------------------|-------------|-------------|-------------|
| H                                                                                   | 1.65478800  | -3.87573400 | 1.09978000  | H                                                                                    | -4.22879400 | -3.10571900 | 0.69053600  |
| O                                                                                   | 1.77379000  | -4.80934800 | -0.76194300 | O                                                                                    | -5.60249100 | -2.26401900 | -0.63694500 |
| H                                                                                   | 1.38233600  | -5.58844400 | -0.36392700 | H                                                                                    | -6.12226900 | -3.05525800 | -0.78874300 |
| C                                                                                   | -3.45746700 | 1.96409800  | 1.52829100  | S                                                                                    | -0.69914300 | 1.82466500  | -0.61696500 |
| C                                                                                   | -4.46546700 | 1.06229800  | 1.42306200  | O                                                                                    | -0.39275800 | 2.37180500  | 0.70743300  |
| C                                                                                   | -2.56766000 | -0.05024500 | 1.41913600  | O                                                                                    | -1.49024600 | 0.47035800  | -0.46495800 |
| H                                                                                   | -3.46910100 | 3.03791700  | 1.60138900  | O                                                                                    | -1.42288900 | 2.67618500  | -1.53324600 |
| H                                                                                   | -5.53199800 | 1.19587700  | 1.37159000  | H                                                                                    | -3.08346100 | 1.88654200  | -2.44342800 |
| H                                                                                   | -1.84079600 | -0.84970900 | 1.33309100  | C                                                                                    | 0.83057800  | 1.29909600  | -1.36619200 |
| N                                                                                   | -2.28261100 | 1.24706000  | 1.53889600  | H                                                                                    | 1.20291000  | 0.47834600  | -0.74555800 |
| N                                                                                   | -3.88993000 | -0.18477600 | 1.37282900  | H                                                                                    | 0.56831600  | 0.88572500  | -2.33985900 |
| C                                                                                   | -0.93608500 | 1.81584300  | 1.65880300  | C                                                                                    | 1.78842600  | 2.49771900  | -1.44929800 |
| H                                                                                   | -0.96673600 | 2.54970700  | 2.46831000  | H                                                                                    | 1.74010600  | 2.95200700  | -2.43948300 |
| H                                                                                   | -0.27680200 | 1.00675200  | 1.97628200  | H                                                                                    | 1.48742300  | 3.27764600  | -0.74427200 |
| C                                                                                   | -0.44214500 | 2.42986000  | 0.35231700  | C                                                                                    | 3.24159600  | 2.11864700  | -1.17705800 |
| H                                                                                   | -0.54922200 | 1.68503100  | -0.44193300 | H                                                                                    | 3.86759600  | 3.01264400  | -1.18381900 |
| H                                                                                   | -1.04305300 | 3.29993100  | 0.07722600  | H                                                                                    | 3.60189000  | 1.40812900  | -1.91966200 |
| C                                                                                   | -4.62703800 | -1.43080500 | 1.15878300  | C                                                                                    | 2.63068900  | 1.66816800  | 1.26054200  |
| H                                                                                   | -4.94809800 | -1.46612700 | 0.11947700  | C                                                                                    | 4.19261900  | 0.41306700  | 0.34992500  |
| H                                                                                   | -3.95933600 | -2.26741400 | 1.33937300  | C                                                                                    | 3.01188800  | 0.73706500  | 2.17101500  |
| H                                                                                   | -5.47207100 | -1.44931000 | 1.84610200  | H                                                                                    | 2.64496300  | 0.53879200  | 3.16367300  |
| C                                                                                   | 1.02055100  | 2.82943400  | 0.52897800  | N                                                                                    | 3.38535400  | 1.44773900  | 0.12493000  |
| H                                                                                   | 1.14008200  | 3.77697900  | 1.05988200  | N                                                                                    | 4.00114700  | -0.02070700 | 1.58883900  |
| H                                                                                   | 1.60363700  | 2.06199000  | 1.04062900  | H                                                                                    | 4.83491900  | -0.05892000 | -0.37692700 |
| S                                                                                   | 1.84802700  | 3.09175000  | -1.03643700 | H                                                                                    | 1.87394400  | 2.43231600  | 1.31533000  |
| O                                                                                   | 1.57041700  | 1.73155700  | -1.81474700 | C                                                                                    | 4.53601400  | -1.26822000 | 2.13344400  |
| H                                                                                   | 2.08512800  | 0.97089800  | -1.46647400 | H                                                                                    | 3.77210600  | -2.03709900 | 2.02538800  |
| O                                                                                   | 3.26387200  | 3.23350100  | -0.77321900 | H                                                                                    | 5.40501400  | -1.56107400 | 1.55119900  |
| O                                                                                   | 1.12611300  | 4.10820200  | -1.76155600 | H                                                                                    | 4.80188900  | -1.10818900 | 3.17700100  |
| H                                                                                   | -3.53556100 | 0.74627300  | -2.17498200 | S                                                                                    | 2.78469200  | -2.04245500 | -1.03135000 |
| S                                                                                   | -2.28864200 | -0.95342300 | -1.68738900 | O                                                                                    | 4.16600200  | -2.31277700 | -0.62305200 |
| O                                                                                   | -2.63693100 | -1.99654900 | -0.72586800 | O                                                                                    | 2.02464600  | -1.32555600 | 0.00565900  |
| O                                                                                   | -2.38192000 | -1.27758600 | -3.09385200 | O                                                                                    | 2.09863100  | -3.10857900 | -1.72449100 |
| O                                                                                   | -3.49211300 | 0.16408800  | -1.40616000 | O                                                                                    | 2.94043600  | -0.81697300 | -2.17521700 |
| O                                                                                   | -1.05838300 | -0.22673300 | -1.30139400 | H                                                                                    | 3.09578000  | -1.24161300 | -3.02823700 |
| TSb-c                                                                               |             |             |             | IMc                                                                                  |             |             |             |
| 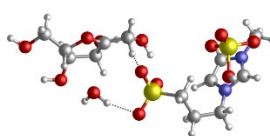 |             |             |             |  |             |             |             |
| O                                                                                   | 4.00342000  | 1.43835600  | -0.69952200 | O                                                                                    | -1.88112900 | -1.73544300 | 0.28671000  |
| C                                                                                   | 3.23492000  | 1.07704900  | 0.27234600  | C                                                                                    | -1.68572800 | -0.71589700 | 1.18114600  |

|   |             |             |             |   |             |             |             |
|---|-------------|-------------|-------------|---|-------------|-------------|-------------|
| C | 5.24200500  | 0.67481100  | -0.68551300 | C | -3.14096800 | -1.54058900 | -0.33036200 |
| H | 5.12697100  | -0.12350100 | -1.41797500 | H | -3.03583900 | -0.89005600 | -1.20788800 |
| C | 3.91713500  | 0.18971500  | 1.28690900  | C | -2.97614300 | 0.02677900  | 1.46581500  |
| H | 3.42476200  | -0.78476300 | 1.32605500  | H | -2.94179100 | 1.03095900  | 1.02289100  |
| C | 5.33770900  | 0.08013800  | 0.73103600  | C | -3.99474700 | -0.83131900 | 0.72697700  |
| H | 5.98237000  | 0.70744600  | 1.35677500  | H | -4.40056800 | -1.55858900 | 1.43933300  |
| O | 3.92849600  | 0.85282400  | 2.52811700  | O | -3.28964100 | 0.10652700  | 2.83753700  |
| H | 3.00332200  | 0.97640800  | 2.78611000  | H | -2.48593900 | 0.38875700  | 3.29155300  |
| O | 5.79145100  | -1.25083600 | 0.72359900  | O | -5.04849700 | -0.06944500 | 0.15643700  |
| H | 6.70697400  | -1.23938100 | 0.42263400  | H | -5.59455800 | -0.69434700 | -0.34056500 |
| O | 3.49915200  | -1.60649400 | -0.95469800 | O | -4.00613100 | 1.88235700  | -1.37992900 |
| H | 4.10015800  | -2.20466900 | -0.49919600 | H | -4.52108800 | 1.28118700  | -0.79780600 |
| C | 1.88939000  | 1.45861900  | 0.36381300  | C | -0.51045000 | -0.45079600 | 1.73463000  |
| H | 1.45127100  | 0.64582600  | -0.50191900 | H | -2.54705700 | 1.52759800  | -1.35487900 |
| H | 1.60330300  | 2.40808700  | -0.09050300 | H | 0.38715500  | -1.00985200 | 1.49963900  |
| O | 1.30306500  | 1.17450500  | 1.60045600  | O | -0.40946200 | 0.59614900  | 2.64771600  |
| H | 0.76195500  | 0.36573700  | 1.48699600  | H | -0.51547000 | 1.41463300  | 2.13287700  |
| C | 6.39440900  | 1.59159300  | -1.02666500 | C | -3.71411300 | -2.87771600 | -0.74369100 |
| H | 6.31244700  | 1.95139500  | -2.05622800 | H | -3.13403700 | -3.31060900 | -1.56281000 |
| H | 6.40516600  | 2.44881200  | -0.34287000 | H | -3.69079800 | -3.55593400 | 0.11614400  |
| O | 7.53560400  | 0.76756100  | -0.84331300 | O | -5.05581100 | -2.59869200 | -1.14200000 |
| H | 8.33003700  | 1.24753300  | -1.08625500 | H | -5.46829900 | -3.39577500 | -1.47984500 |
| S | 0.20249700  | -1.42497000 | -0.61163500 | S | -0.62079700 | 2.34572500  | -0.79477500 |
| O | 0.23512200  | -1.20515200 | 0.86103800  | O | -0.67066900 | 2.50510300  | 0.66285000  |
| O | 0.74101900  | -0.21605500 | -1.32724100 | O | -1.58252600 | 1.19098700  | -1.24785400 |
| O | 0.86072600  | -2.66343900 | -1.04016300 | O | -0.87631500 | 3.54218700  | -1.57279500 |
| H | 2.69373700  | -2.11350900 | -1.14799100 | H | -4.24944400 | 2.78972200  | -1.17805500 |
| C | -1.51882500 | -1.51545700 | -1.05891600 | C | 0.95863800  | 1.64635200  | -1.21473200 |
| H | -1.94896500 | -0.56099000 | -0.74005400 | H | 1.05770100  | 0.72916100  | -0.62261000 |
| H | -1.55798900 | -1.55601700 | -2.14700200 | H | 0.91676600  | 1.36440500  | -2.26622000 |
| C | -2.16579300 | -2.73540400 | -0.39386000 | C | 2.02514900  | 2.71135600  | -0.92866400 |
| H | -2.16579500 | -3.58560700 | -1.07688900 | H | 2.12775500  | 3.37477800  | -1.78849600 |
| H | -1.58139100 | -3.05118600 | 0.47487300  | H | 1.71325300  | 3.34817000  | -0.09550400 |
| C | -3.60403800 | -2.47317800 | 0.03375000  | C | 3.39421300  | 2.12029400  | -0.61966200 |
| H | -4.02804800 | -3.36059200 | 0.50774200  | H | 4.10717600  | 2.91931200  | -0.40793100 |
| H | -4.21459900 | -2.17926300 | -0.81974900 | H | 3.75006900  | 1.51266800  | -1.45067700 |
| C | -2.71486600 | -0.96864500 | 1.89540400  | C | 2.45903900  | 1.30651600  | 1.60878800  |
| C | -4.68412600 | -0.48021900 | 1.03979300  | C | 4.03166600  | 0.09575900  | 0.65969900  |
| C | -3.17864200 | 0.15137100  | 2.50406000  | C | 2.66580800  | 0.20656600  | 2.37475700  |
| H | -2.72513500 | 0.78864600  | 3.24290000  | H | 2.15783400  | -0.12197100 | 3.26555400  |
| N | -3.68017400 | -1.35303600 | 0.98674300  | N | 3.33139500  | 1.22134500  | 0.54266000  |
| N | -4.41412800 | 0.42887300  | 1.96751500  | N | 3.66295100  | -0.52563800 | 1.77288400  |
| H | -5.53691400 | -0.45839800 | 0.38019600  | H | 4.71863100  | -0.30054700 | -0.07121900 |
| H | -1.76416900 | -1.46813600 | 1.98464900  | H | 1.74415700  | 2.10366500  | 1.71823300  |

|   |             |             |             |   |            |             |             |
|---|-------------|-------------|-------------|---|------------|-------------|-------------|
| C | -5.16676800 | 1.66203000  | 2.18636000  | C | 4.03615500 | -1.89331100 | 2.12983500  |
| H | -4.64397100 | 2.47300200  | 1.68139400  | H | 3.20895800 | -2.54996600 | 1.86183700  |
| H | -6.14870500 | 1.55810300  | 1.73387600  | H | 4.90389200 | -2.18220300 | 1.54367000  |
| H | -5.24666500 | 1.83799800  | 3.25823800  | H | 4.25048900 | -1.93422200 | 3.19655500  |
| S | -4.10068700 | 1.45327200  | -1.36133700 | S | 2.60041700 | -1.89968300 | -1.30997200 |
| O | -5.39645800 | 1.69574200  | -0.71547600 | O | 3.88601300 | -2.39602100 | -0.80675300 |
| O | -3.00332500 | 1.31161700  | -0.39874100 | O | 1.77655000 | -1.29431900 | -0.25651000 |
| O | -3.83724200 | 2.22455100  | -2.55865600 | O | 1.92560100 | -2.74253900 | -2.27400800 |
| O | -4.23618100 | -0.13460100 | -1.91456700 | O | 3.02675000 | -0.52360800 | -2.18503500 |
| H | -4.60283300 | -0.08984700 | -2.80582200 | H | 3.25774400 | -0.81747300 | -3.07477700 |

IMf

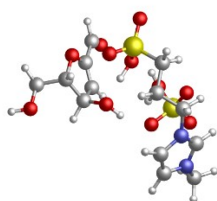

|   |             |             |             |
|---|-------------|-------------|-------------|
| O | -3.82373500 | -0.13292200 | 0.14140500  |
| C | -3.35616200 | -1.06352800 | -0.73207400 |
| C | -3.20921200 | -0.41313000 | 1.41367400  |
| H | -2.84939300 | 0.52779300  | 1.83438300  |
| C | -2.39352300 | -1.85882700 | -0.26053700 |
| H | -1.88191900 | -2.62642100 | -0.82152300 |
| C | -2.03836300 | -1.36117500 | 1.11763700  |
| H | -1.94029500 | -2.13083500 | 1.88465200  |
| O | -0.83856300 | -0.57357400 | 1.09222600  |
| H | -0.98891300 | 0.41994600  | 0.00229900  |
| C | -3.94790900 | -1.01394600 | -2.09410500 |
| H | -4.60123700 | -0.14448000 | -2.28449600 |
| O | -3.72785400 | -1.84989800 | -2.92711100 |
| C | -4.27217800 | -1.04453800 | 2.29537500  |
| H | -5.09614300 | -0.33328100 | 2.40577700  |
| H | -4.65146400 | -1.95192700 | 1.80735400  |
| O | -3.66149700 | -1.34153100 | 3.53748200  |
| H | -4.33218100 | -1.63930100 | 4.15482500  |
| C | 3.17557100  | 0.17408800  | 2.25045900  |
| C | 3.66619600  | -1.08407600 | 2.11918700  |
| C | 4.05919700  | -0.00694900 | 0.24770000  |
| H | 2.65064400  | 0.64649800  | 3.06298700  |
| H | 3.65177700  | -1.92237200 | 2.79349300  |
| H | 4.31356800  | 0.19894700  | -0.77983600 |
| N | 3.43876200  | 0.83389000  | 1.07037600  |
| N | 4.22455800  | -1.17151900 | 0.86419000  |
| C | 2.88382400  | 2.13744500  | 0.67069100  |

TSf-g

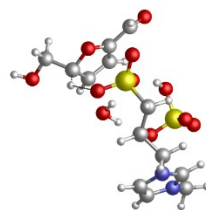

|   |             |             |             |
|---|-------------|-------------|-------------|
| O | 3.69354000  | -0.00540900 | 0.10529400  |
| C | 3.19258200  | 0.42966900  | -1.01956300 |
| C | 3.32918000  | 0.93632900  | 1.13159000  |
| H | 2.73962500  | 0.38002300  | 1.86738200  |
| C | 2.57845700  | 1.66775700  | -0.94649400 |
| H | 2.11178900  | 2.17723400  | -1.77410000 |
| C | 2.52471200  | 1.96903000  | 0.40889900  |
| H | 2.29618300  | 2.91898400  | 0.86653800  |
| O | 0.66543900  | 1.31193900  | 1.10128800  |
| H | 0.76228900  | 0.41520000  | 0.71340800  |
| C | 3.32015600  | -0.48584300 | -2.21053700 |
| H | 3.41081500  | -1.55567300 | -1.96441700 |
| O | 3.29091100  | -0.03182200 | -3.31711300 |
| C | 4.61344000  | 1.48898100  | 1.74270800  |
| H | 5.13917000  | 0.66383500  | 2.23107700  |
| H | 5.24573700  | 1.89445000  | 0.94380400  |
| O | 4.21355700  | 2.48812300  | 2.65321000  |
| H | 4.95289400  | 2.72346700  | 3.21757100  |
| C | -3.36473600 | 0.03986600  | 2.25926500  |
| C | -3.97099500 | 1.19627400  | 1.89081500  |
| C | -4.15322500 | -0.22346700 | 0.22739800  |
| H | -2.83620700 | -0.22461700 | 3.15868000  |
| H | -4.07428400 | 2.13554700  | 2.40521000  |
| H | -4.32307200 | -0.62933200 | -0.75665900 |
| N | -3.49563600 | -0.83766400 | 1.20534400  |
| N | -4.46914000 | 1.00496400  | 0.62188100  |
| C | -2.76700800 | -2.10877600 | 1.04637400  |

|   |             |             |             |   |             |             |             |
|---|-------------|-------------|-------------|---|-------------|-------------|-------------|
| H | 3.33826100  | 2.91056500  | 1.29241300  | H | -3.16363000 | -2.82856500 | 1.76440900  |
| H | 3.18505200  | 2.28251100  | -0.36556100 | H | -2.98007500 | -2.44732100 | 0.03365100  |
| C | 1.35335600  | 2.10655000  | 0.78677800  | C | -1.26491100 | -1.85621100 | 1.21812500  |
| H | 1.04826000  | 1.06583600  | 0.67321700  | H | -1.08024700 | -0.83173600 | 0.89069400  |
| H | 1.02188700  | 2.44811700  | 1.76949300  | H | -0.96767800 | -1.93262300 | 2.26644400  |
| C | 4.65136200  | -2.40859200 | 0.20903100  | C | -4.94583400 | 2.06101500  | -0.27135200 |
| H | 3.76103700  | -2.95603400 | -0.10002400 | H | -4.07736500 | 2.56990400  | -0.69181100 |
| H | 5.22646600  | -2.15350100 | -0.67788600 | H | -5.51495100 | 1.60638400  | -1.07941300 |
| H | 5.26214400  | -2.98221100 | 0.90378400  | H | -5.58017700 | 2.74016300  | 0.29516700  |
| C | 0.69046700  | 2.93306100  | -0.30810600 | C | -0.41750300 | -2.79530900 | 0.36783600  |
| H | 0.74520800  | 4.01065200  | -0.14137400 | H | -0.34093600 | -3.80633900 | 0.77114700  |
| H | 1.08914800  | 2.67760700  | -1.29108600 | H | -0.77477000 | -2.81920000 | -0.66352300 |
| S | -1.06051300 | 2.56311800  | -0.40479300 | S | 1.26256400  | -2.15819600 | 0.27191300  |
| O | -1.04707700 | 1.03006400  | -0.83046900 | O | 1.08959800  | -0.84512700 | -0.47518100 |
| H | -0.05680000 | -1.07139600 | 0.75214600  | H | -0.15741400 | 1.60978200  | 0.65382400  |
| O | -1.62194400 | 2.64676500  | 0.93103900  | O | 1.69235700  | -1.87394500 | 1.64779900  |
| O | -1.62968000 | 3.31641500  | -1.49217100 | O | 2.07024400  | -3.10293500 | -0.49148200 |
| H | -0.26604700 | -0.32246800 | -2.10541600 | H | 0.24721300  | 0.01997800  | -1.73382800 |
| S | 1.68711700  | -0.88673000 | -1.47710000 | S | -1.76002000 | 0.64548600  | -1.56199100 |
| O | 1.40730800  | -1.22535100 | -0.05048900 | O | -1.67877100 | 1.24053700  | -0.19557300 |
| O | 2.63714800  | -1.80744900 | -2.07525100 | O | -2.61203300 | 1.41979600  | -2.44819700 |
| O | 0.29955700  | -1.10051600 | -2.26261800 | O | -0.27328900 | 0.73462800  | -2.16666000 |
| O | 2.02212200  | 0.53907900  | -1.62598500 | O | -2.07256200 | -0.79368200 | -1.49275400 |

IMg

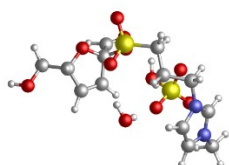

|   |             |             |             |
|---|-------------|-------------|-------------|
| O | -3.55472200 | 0.18425300  | 0.28894600  |
| C | -2.32007000 | 0.78420200  | 0.50504700  |
| C | -3.77135700 | -0.04222400 | -1.11303900 |
| H | -3.77412800 | -1.11851300 | -1.31055500 |
| C | -1.77728900 | 1.11852200  | -0.86028900 |
| H | -0.82945600 | 1.62330000  | -0.98983500 |
| C | -2.60582400 | 0.62720700  | -1.77255300 |
| H | -2.47824500 | 0.64830900  | -2.84608100 |
| O | 0.26503900  | -1.09927700 | -2.42799000 |
| H | -0.51355600 | -1.36816000 | -1.92466400 |
| C | -2.54946100 | 2.01985800  | 1.38474700  |
| H | -3.47450200 | 2.56040600  | 1.11043600  |
| O | -1.82070900 | 2.38824700  | 2.25686600  |
| C | -5.11943000 | 0.55850500  | -1.47605100 |

IMh

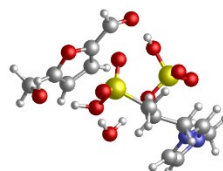

|   |             |             |             |
|---|-------------|-------------|-------------|
| O | -3.32305600 | -1.50321400 | 0.21262200  |
| C | -2.10312900 | -1.99200100 | -0.14442200 |
| C | -3.27504500 | -1.24898700 | 1.53550900  |
| H | -3.15335300 | 1.29814600  | 0.86383000  |
| C | -1.28722800 | -2.07389300 | 0.94530100  |
| H | -0.26016900 | -2.40927500 | 0.95568200  |
| C | -2.05658200 | -1.58404600 | 2.04356100  |
| H | -1.72891000 | -1.45917200 | 3.06328200  |
| O | 0.16762600  | 0.62572000  | 2.33847700  |
| H | -0.66931000 | 0.62337500  | 1.86130600  |
| C | -1.92687200 | -2.28880400 | -1.56332500 |
| H | -2.81090400 | -2.10108900 | -2.18964400 |
| O | -0.89789300 | -2.71622700 | -2.03576100 |
| C | -4.46805100 | -0.56058100 | 2.09721600  |



|   |             |             |             |   |             |             |             |
|---|-------------|-------------|-------------|---|-------------|-------------|-------------|
| H | -5.89716900 | 0.07557000  | -0.87509900 | H | -5.37485400 | -1.14995100 | 1.94351700  |
| H | -5.10471200 | 1.63121600  | -1.24619200 | H | -4.32754900 | -0.40306900 | 3.16550100  |
| O | -5.29790300 | 0.32222100  | -2.85867900 | O | -4.62707100 | 0.73439500  | 1.49287900  |
| H | -6.17185100 | 0.61622000  | -3.12183000 | H | -5.24168700 | 0.67702400  | 0.75413200  |
| C | 3.15236300  | -1.63154000 | -1.50864900 | C | 2.65896300  | 2.05302700  | 1.33220200  |
| C | 3.88007700  | -0.64382100 | -2.08651200 | C | 3.71513300  | 1.37155400  | 1.83949500  |
| C | 4.05876300  | -0.42252700 | 0.09084400  | C | 3.72252200  | 1.09335200  | -0.33859800 |
| H | 2.49523500  | -2.36293100 | -1.94725900 | H | 1.87000300  | 2.58634800  | 1.83188600  |
| H | 4.01560400  | -0.38313400 | -3.12145300 | H | 4.03455700  | 1.22344800  | 2.85600500  |
| H | 4.26371000  | -0.00149000 | 1.06204500  | H | 3.95211200  | 0.71126600  | -1.31987100 |
| N | 3.28856900  | -1.48197700 | -0.14491600 | N | 2.68610500  | 1.87202600  | -0.03452400 |
| N | 4.44303600  | 0.09514200  | -1.06952400 | N | 4.37037700  | 0.78767800  | 0.77865900  |
| C | 2.48976100  | -2.17611100 | 0.87771300  | C | 1.67361300  | 2.33824100  | -0.99166700 |
| H | 2.82521100  | -3.21308300 | 0.93791100  | H | 1.74378500  | 3.42755700  | -1.05466000 |
| H | 2.69403800  | -1.66766300 | 1.81872700  | H | 1.92829900  | 1.89559200  | -1.95470400 |
| C | 1.01271700  | -2.05210600 | 0.50448300  | C | 0.29127400  | 1.87874100  | -0.54713500 |
| H | 0.88430300  | -1.08370300 | 0.02505200  | H | 0.26444300  | 0.78909600  | -0.62978500 |
| H | 0.72675000  | -2.81996800 | -0.21664300 | H | 0.12764300  | 2.14707900  | 0.49506000  |
| C | 5.15165000  | 1.36321700  | -1.23349800 | C | 5.46779400  | -0.17217400 | 0.88730500  |
| H | 4.44012700  | 2.11102500  | -1.57981700 | H | 5.07942500  | -1.08928000 | 1.32598900  |
| H | 5.52709100  | 1.67878400  | -0.26380500 | H | 5.82432800  | -0.40490200 | -0.11202500 |
| H | 5.96987800  | 1.22455200  | -1.93856600 | H | 6.26077800  | 0.26708600  | 1.49096900  |
| C | 0.09134300  | -2.09043800 | 1.70987800  | C | -0.80751400 | 2.51133200  | -1.39162000 |
| H | -0.01111900 | -3.07078600 | 2.17934300  | H | -0.97879100 | 3.56312000  | -1.15810800 |
| H | 0.36381300  | -1.33294500 | 2.44781300  | H | -0.63905700 | 2.39294900  | -2.46480500 |
| S | -1.57118500 | -1.67183700 | 1.18136900  | S | -2.36669700 | 1.67457400  | -1.11996400 |
| O | -1.41620300 | -0.06004900 | 1.25405800  | O | -2.32246500 | 0.39515400  | -1.79390500 |
| H | 0.58728700  | -0.31102000 | -1.96535000 | H | 0.72856200  | 0.00982400  | 1.83270300  |
| O | -1.75549500 | -2.05309200 | -0.21127600 | O | -2.25478300 | 1.45276600  | 0.46625400  |
| O | -2.51809900 | -2.11780700 | 2.16983800  | O | -3.48582100 | 2.55699800  | -1.37455200 |
| H | 0.11930300  | 2.28816500  | 1.69997300  | H | 0.68827000  | -2.82112200 | -1.29327600 |
| S | 1.78994300  | 1.53833100  | 0.57073600  | S | 2.22993200  | -1.51774500 | -0.54516900 |
| O | 1.46154800  | 0.95518600  | -0.74656200 | O | 1.81419000  | -1.04280000 | 0.79615800  |
| O | 3.00822600  | 2.34048700  | 0.53731500  | O | 3.66290300  | -1.79812600 | -0.61028500 |
| O | 0.56452300  | 2.54849600  | 0.87656100  | O | 1.50402000  | -2.93204500 | -0.75731900 |
| O | 1.75899000  | 0.54674900  | 1.66098800  | O | 1.74309700  | -0.62959700 | -1.61616200 |
